# Supplementary material for: Formal reasoning about systems biology using theorem proving
Source: PLoS One. 2017 Jul 3;12(7):e0180179. doi: 10.1371/journal.pone.0180179 (PMC5495343; doi:10.1371/journal.pone.0180179)
Supplement: S2 Formalization — (ML) [file pone.0180179.s003.ml]

(* ========================================================================= *)
(*---------------------------------------------------------------------------*)
(* Description: Formalization of Reaction Kinetics                           *)
(*---------------------------------------------------------------------------*)
(*                                                                           *)
(*     (c) Author :  Adnan Rashid*			                                 *)
(*      Co-Author :  Umair Siddique**					                     *)
(*                                                                           *)
(* 	   *System Analyis & Verification (SAVe) LAB                  	         *)
(*          School of Electrical Engineering and Computer Sciences           *)
(*          National University of Sciences and Technology (NUST)            *)
(*                     Islamabad, Pakistan                                   *)
(*                                                                	         *)
(*        **Hardware Verification Group                                      *)
(*          Department of Electrical and Computer Engineering                *)
(*                Concordia University, Montreal, Canada                     *)
(*                                                                           *)
(*     Contact: *<adnan.rashid@seecs.edu.pk>,                                *)
(*              **<muh_sidd@ece.concordia.ca>                                *)
(*                                                                           *)
(* NOTE: This Script is written in HOL Light		               	         *)
(*                                                                           *)
(* ========================================================================= *)

needs "Multivariate/real.ml";;   

(*---------------------------------------------------------------------------*)
(*===========================================================================*)
(*             Definitions of the Reaction Kinetics Formalization            *)
(*===========================================================================*)
(*---------------------------------------------------------------------------*)


(* =========================================================*)
(*  ....................... DESCRIPTION ....................

Type of a singal reaction with N reactants and M products and 
(k1,&0) forward rate pair  in case of irrevesible reaction and 
(k2_f,k2_n) forward and reverse rates in terms of irrevisible reactions.

So, a single reaction will be of this form:

(t,(R,P,(k1,k2)))

t = type (rev or irrev) 
R = List of reactants of type (num # real)list
P = List of products of type (num # real)list
k1,k2 = rates 

		
...............................end..........................*)
(* =========================================================*)


(*==========================================================*)
(*               Start of the Formalization                 *)
(*==========================================================*)

let rection_type_IND,rection_type_REC = define_type
  "reaction_type = irreversible | reversible ";;


let IRREVERSIBLE_REVERSIBLE = 
    prove_constructors_distinct rection_type_REC;;


new_type_abbrev ("bio_reaction",

`:(reaction_type#((num#real)list#(num#real)list#(real#real)))`);;

(*==========================================================*)
(*             Formalization of the Flux Vector             *)
(*==========================================================*)

let flux_irr = define `
    (flux_irr []  = &1) /\
    (flux_irr (CONS h t)  = 
    (if (FST h = 0) then (flux_irr t) else
        ((SND h) pow (FST h))* flux_irr t))`;;


let flux_irr = new_definition `
    (flux_irr []  = &1) /\
    (flux_irr (CONS h t)  = 
    (if (FST h = 0) then (flux_irr t) else
        ((SND h) pow (FST h))* flux_irr t))`;;


let gen_flux_irreversible = new_definition `
    gen_flux_irreversible reactants_list products_list rate = 
    rate * flux_irr reactants_list`;;

let gen_flux_reversible = new_definition `
    gen_flux_reversible reactants_list products_list rate_1 rate_2 =
         rate_1 * flux_irr reactants_list - rate_2 * flux_irr products_list`;;

(*---------------------------------------------------------*)

let reac_type = new_definition `
    reac_type ((t,(R,P,(k1,k2))):bio_reaction)  = t`;;
   
let reactants_list = new_definition `
    reactants_list  ((t,(R,P,(k1,k2))):bio_reaction)  = R`;;

let products_list = new_definition `
    products_list  ((t,(R,P,(k1,k2))):bio_reaction)  = P`;;
     
let rate_forward = new_definition `
    rate_forward  ((t,(R,P,(k1,k2))):bio_reaction)  = k1`;;
     
let rate_reverse = new_definition `
    rate_reverse  ((t,(R,P,(k1,k2))):bio_reaction)  = k2`;;

(*---------------------------------------------------------*)

let flux_sing = new_definition `
    flux_sing ((t,(R,P,(k1,k2))):bio_reaction) = 
    if t = irreversible then 
    (gen_flux_irreversible R P k1) else 
     gen_flux_reversible R P k1 k2`;;

let flux = new_definition `
    flux (M:bio_reaction list) = 
    vector (MAP  flux_sing M)`;;

(*==========================================================*)
(*        Formalization of the Stoichiometric Matrix        *)
(*==========================================================*)

let stioch_mat_column = define ` 
    (stioch_mat_column [] [] = [] ) /\ 
    (stioch_mat_column (CONS h t) [] = []) /\ 
    (stioch_mat_column [] (CONS h t) = []) /\
    (stioch_mat_column (CONS h1 t1) (CONS h2 t2) = 
     CONS (&(FST (h2:num#real)) - &(FST (h1:num#real))) 
           (stioch_mat_column t1 t2))`;;

let stioch_mat_column = new_definition ` 
    (stioch_mat_column [] [] = [] ) /\ 
    (stioch_mat_column (CONS h t) [] = []) /\ 
    (stioch_mat_column [] (CONS h t) = []) /\
    (stioch_mat_column (CONS h1 t1) (CONS h2 t2) = 
     CONS (&(FST (h2:num#real)) - &(FST (h1:num#real))) 
           (stioch_mat_column t1 t2))`;;

let st_matrix_sing = new_definition `
    st_matrix_sing ((t,(R,P,(k1,k2))):bio_reaction) = 
    vector (stioch_mat_column R P)`;;

let st_matrix = new_definition `
     st_matrix (M: bio_reaction list) = 
     vector (MAP st_matrix_sing M)`;;

(*==========================================================*)

let map_real_deriv = define ` 
   (map_real_deriv [] x = [])  /\  
   (map_real_deriv (CONS h t) x = 
    APPEND [(real_derivative h x)] (map_real_deriv t x))`;;

let map_real_deriv = new_definition ` 
   (map_real_deriv [] x = [])  /\  
   (map_real_deriv (CONS h t) x = 
    APPEND [(real_derivative h x)] (map_real_deriv t x))`;;

let entities_deriv_vec = new_definition `
    entities_deriv_vec L t = 
    vector (map_real_deriv L t) `;;

	
(*---------------------------------------------------------------------------*)
(*===========================================================================*)
(*                               Simplifiers                                 *)
(*===========================================================================*)
(*---------------------------------------------------------------------------*)


let KINETIC_SIMP L = 
    REWRITE_TAC (L@[flux_irr;FST;SND;gen_flux_irreversible;
                 ARITH_RULE ` ~(1 = 0) /\ ~(2 = 0)`;
                 REAL_MUL_LID;REAL_MUL_RID;REAL_POW_1;
                 gen_flux_reversible; st_matrix_sing;st_matrix;
                 flux_sing;flux;map_real_deriv;APPEND;MAP;
                stioch_mat_column; IRREVERSIBLE_REVERSIBLE;
               entities_deriv_vec]);;

let COMMON_TAC xs =
  SIMP_TAC (xs @ [CART_EQ;VECTOR_1;VECTOR_2;VECTOR_3; 
                       DIMINDEX_1;DIMINDEX_2;DIMINDEX_3;
                         FORALL_1; FORALL_2;FORALL_3;
			  DOT_1; DOT_2;DOT_3;SUM_1;SUM_2;SUM_3]);;

			  
(*---------------------------------------------------------------------------*)
(*===========================================================================*)
(*     Supporting Theorems used in the Formalization of Reaction Kinetics    *)
(*===========================================================================*)
(*---------------------------------------------------------------------------*)


g `!a b c g h i. 
     transp ((vector [vector [a;b;c]; vector [g;h;i]]):real^3^2) 
                     = vector [vector [a;g]; vector [b;h]; vector [c;i]]`;;

e (SIMP_TAC [CART_EQ; transp; LAMBDA_BETA]);;
e (SIMP_TAC [DIMINDEX_3; DIMINDEX_2]);;
e (SIMP_TAC [FORALL_3; FORALL_2]);;
e (COMMON_TAC [VECTOR_3]);;

let TRANSP_2X3_MAT_LEMMA = top_thm();;


g `! A t. real_derivative A t = real_derivative (\t. A t) t`;;

e (SIMP_TAC [ETA_AX]);;

let DERIV_ABST = top_thm();;


let VECTOR3_EQ = 
prove (`!x y z t w v. vector [x;y;z] :A^3 = vector [t;w;v] <=> x = t /\ y = w /\ z = v`,
COMMON_TAC[]);;


g `!a b c d e f X Y.
     ((vector [vector [a; b]; vector [c; d]; vector [e; f]]) : real^2^3) ** vector [X; Y] =
     vector [a * X + b * Y; c * X + d * Y; e * X + f * Y]`;;

e (COMMON_TAC [MATRIX_VECTOR_MUL_COMPONENT]);;

let MAT3X2_VECTOR_MUL = top_thm();;


(*===========================================================================*)
(*    Supporting Theorems for verification of Tumor_Growth kinetic model     *)
(*===========================================================================*)

let HAS_SIZE_4 = define_finite_type 4;;

let DIMINDEX_4 = MATCH_MP DIMINDEX_UNIQUE HAS_SIZE_4;;

let VECTOR_4 = prove
 (`(vector[w;x;y;z]:A^4)$1 = w /\
   (vector[w;x;y;z]:A^4)$2 = x /\
   (vector[w;x;y;z]:A^4)$3 = y /\
   (vector[w;x;y;z]:A^4)$4 = z`,
  SIMP_TAC[vector; LAMBDA_BETA; DIMINDEX_4; ARITH; LENGTH; EL] THEN
  REWRITE_TAC[num_CONV `3`; num_CONV `2`; num_CONV `1`; HD; TL; EL]);;

let FORALL_4 = prove
 (`!P. (!i. 1 <= i /\ i <= 4 ==> P i) <=> P 1 /\ P 2 /\ P 3 /\ P 4`,
  MESON_TAC[ARITH_RULE `1 <= i /\ i <= 4 <=>
    i = 1 \/ i = 2 \/ i = 3 \/ i = 4`]);;

(*---------------------------------------------------------------------------*)

let FORALL_8_LEMMA = 
    ARITH_RULE `1 <= i /\ i <= 8 <=>
       i = 1 \/ i = 2 \/ i = 3 \/ i = 4 \/
       i = 5 \/ i = 6 \/ i = 7 \/ i = 8`;;


let FORALL_8 = prove
    (`!P. (!i. 1 <= i /\ i <= 8 ==> P i) <=> 
        P 1 /\ P 2 /\ P 3 /\ P 4 /\ 
        P 5 /\ P 6 /\ P 7 /\ P 8`,
          SIMP_TAC [FORALL_8_LEMMA] THEN MESON_TAC []);;

let HAS_SIZE_8 = define_finite_type 8;;

let DIMINDEX_8 = MATCH_MP DIMINDEX_UNIQUE HAS_SIZE_8;;


let VECTOR_8 = prove
 (`! a b c d w x y z. 
   (vector[a; b; c; d; w; x; y; z]:A^8)$1 = a /\
   (vector[a; b; c; d; w; x; y; z]:A^8)$2 = b /\
   (vector[a; b; c; d; w; x; y; z]:A^8)$3 = c /\
   (vector[a; b; c; d; w; x; y; z]:A^8)$4 = d /\
   (vector[a; b; c; d; w; x; y; z]:A^8)$5 = w /\
   (vector[a; b; c; d; w; x; y; z]:A^8)$6 = x /\
   (vector[a; b; c; d; w; x; y; z]:A^8)$7 = y /\
   (vector[a; b; c; d; w; x; y; z]:A^8)$8 = z `,
       SIMP_TAC [vector; LAMBDA_BETA; DIMINDEX_8; ARITH; LENGTH; EL] THEN
       REWRITE_TAC [num_CONV `3`; num_CONV `2`; num_CONV `1`;
            num_CONV `7`; num_CONV `5`; num_CONV `6`; num_CONV `8`; num_CONV `4`; HD; TL; EL]);;


g `(transp (vector
         [vector [&1; &0; &0; &0]; 
  	  vector [&0; &1; &0; &0]; 
  	  vector [-- &1; &2; &0; &0]; 
  	  vector [&0; &1; &0; &0]; 
  	  vector [&0; -- &1; &2; &0]; 
  	  vector [-- &1; &0; &0; &1]; 
  	  vector [&0; -- &1; &0; &1]; 
  	  vector [&0; &0; -- &1; &1]])):real^8^4 =
           (vector [
  	  vector [&1; &0; -- &1; &0; &0; -- &1; &0; &0];
  	  vector [&0; &1; &2; &1; -- &1; &0; -- &1; &0];
  	  vector [&0; &0; &0; &0; &2; &0; &0; -- &1];
  	  vector [&0; &0; &0; &0; &0; &1; &1; &1] ])`;;

e (SIMP_TAC [CART_EQ; transp; LAMBDA_BETA]);;
e (SIMP_TAC [DIMINDEX_4; DIMINDEX_8]);;
e (SIMP_TAC [FORALL_4; FORALL_8]);;
e (COMMON_TAC [VECTOR_8; VECTOR_4; DIMINDEX_4; DIMINDEX_8]);;

let TRANSP_8X3_MAT_LEMMA = top_thm();;


let SUM_8 = prove
 (`!t. sum(1..8) t = t(1) + t(2) + t(3) + t(4) + 
                     t(5) + t(6) + t(7) + t(8)  `,
  SIMP_TAC [num_CONV `4`; num_CONV `3`; num_CONV `2`; 
            num_CONV `8`; num_CONV `7`; num_CONV `6`;
	    num_CONV `5`] THEN
 	    REWRITE_TAC [SUM_CLAUSES_NUMSEG] THEN 
  	    REWRITE_TAC [SUM_SING_NUMSEG; ARITH; REAL_ADD_ASSOC]);;


g `((vector [
       vector [a1; a2; a3; a4; a5; a6; a7; a8];
       vector [b1; b2; b3; b4; b5; b6; b7; b8];
       vector [c1; c2; c3; c4; c5; c6; c7; c8];
       vector [d1; d2; d3; d4; d5; d6; d7; d8] ]):real^8^4) ** 
       vector [x1; x2; x3; x4; x5; x6; x7; x8] = 
      (vector[
       a1 * x1 + a2 * x2  + a3 * x3  + a4 * x4 +
       a5 * x5 + a6 * x6  + a7 * x7  + a8 * x8 ;
       b1 * x1 + b2 * x2  + b3 * x3  + b4 * x4 +
       b5 * x5 + b6 * x6  + b7 * x7  + b8 * x8 ;
       c1 * x1 + c2 * x2  + c3 * x3  + c4 * x4 +
       c5 * x5 + c6 * x6  + c7 * x7  + c8 * x8 ;
       d1 * x1 + d2 * x2  + d3 * x3  + d4 * x4 +
       d5 * x5 + d6 * x6  + d7 * x7  + d8 * x8 ]):real^4`;;

e (COMMON_TAC [matrix_vector_mul; 
               DIMINDEX_8; LAMBDA_BETA; DIMINDEX_4;
	       DIMINDEX_8; FORALL_4; FORALL_8; SUM_8]);;
e (SIMP_TAC [VECTOR_8; VECTOR_4]);;

let MATRIX_VEXTOR_8X4 = top_thm();;


g `(transp (vector
         [vector [&0; &1; &0];  
  	  vector [-- &1; &0; &1]; 
  	  vector [&0; -- &1; &1]])):real^3^3 =
           (vector [
  	  vector [&0; -- &1; &0];
  	  vector [&1; &0; -- &1];
  	  vector [&0; &1; &1] ])`;;


e (SIMP_TAC [CART_EQ; transp; LAMBDA_BETA]);;
e (SIMP_TAC [DIMINDEX_3]);;
e (SIMP_TAC [FORALL_3]);;
e (COMMON_TAC [VECTOR_3; DIMINDEX_3]);;

let TRANSP_3X3_MAT_LEMMA = top_thm();;


g `((vector [
       vector [a1; a2; a3];
       vector [b1; b2; b3];
       vector [c1; c2; c3] ]):real^3^3) ** 
       vector [x1; x2; x3] = 
      (vector[
       a1 * x1 + a2 * x2  + a3 * x3 ;
       b1 * x1 + b2 * x2  + b3 * x3 ;
       c1 * x1 + c2 * x2  + c3 * x3 ]):real^3`;;

e (COMMON_TAC [matrix_vector_mul; 
               DIMINDEX_3; LAMBDA_BETA; FORALL_3; SUM_3]);;

let MATRIX_VEXTOR_3X3 = top_thm();;


(*---------------------------------------------------------------------------*)
(*===========================================================================*)
(*             Properties of Reaction Kinetics Based Modeling                *)
(*===========================================================================*)
(*---------------------------------------------------------------------------*)


(*===========================================================================*)
(*                           Reaction Scheme 01                              *)
(*---------------------------------------------------------------------------*)
(*                  The Irreverible Consecutive Reactions                    *)
(*===========================================================================*)

let rea_sch_01 = new_definition`
   rea_sch_01 A B C k1 k2 t = 
  [(irreversible, ([(1,A t); (0,B t); (0,C t)], [(0,A t); (1,B t); (0,C t)], (k1,&0)));
   (irreversible, ([(0,A t); (1,B t); (0,C t)], [(0,A t); (0,B t); (1,C t)], (k2,&0)))]`;;


g `! A B C k1 k2 t. 
      ((entities_deriv_vec [A;B;C] t):real^3) =
       vector [real_derivative A t; real_derivative B t; real_derivative C t]`;;

e (KINETIC_SIMP []);;

let ENTITIES_DERIVATIVE_VEC = top_thm();;


g `!A B C k1 k2 t. 
    transp((st_matrix (rea_sch_01 A B C k1 k2 t)):real^3^2) = 
       vector [vector [&0 - &1; &0 - &0]; 
               vector [&1 - &0; &0 - &1]; 
	       vector [&0 - &0; &1 - &0]]`;;

e (KINETIC_SIMP [rea_sch_01; TRANSP_2X3_MAT_LEMMA]);;

let ST_MATRIX_REA_SCH_01 = top_thm();;


g `!A B C k1 k2 t.
    flux (rea_sch_01 A B C k1 k2 t) = 
       vector [k1 * A t; k2 * B t]`;;

e (KINETIC_SIMP [rea_sch_01]);;

let FLUX_VECTOR_REA_SCH_01 = top_thm();;


g `! A B C t k1 k2. 
     (&0 < k1) /\ (&0 < k2) /\ ~((k2 - k1) = &0) /\
     (A (&0) = A0) /\ (B (&0) = &0) /\ (C (&0) = &0) /\
     (!t. A t = A0 * exp (--k1 * t)) /\
     (!t. B t = A0 * ((k1 / (k2 - k1)) * (exp (--k1 * t) - exp (--k2 * t)))) /\
     (!t. C t = A0 * (&1 - ((k2 / (k2 - k1)) * (exp (--k1 * t))) - 
                           ((k1 / (k1 - k2)) * (exp (--k2 * t))))) 
               ==>
    (real_derivative (\t. A t) t = (-- k1 * A t)) /\
    (real_derivative (\t. B t) t = (k1 * A t - k2 * B t)) /\
    (real_derivative (\t. C t) t = (k2 * B t)) `;;

e (SIMP_TAC []);;
e (REPEAT STRIP_TAC);;
e (MATCH_MP_TAC HAS_REAL_DERIVATIVE_DERIVATIVE);;
e (REAL_DIFF_TAC);;
e (REAL_ARITH_TAC);;

e (MATCH_MP_TAC HAS_REAL_DERIVATIVE_DERIVATIVE);;
e (REAL_DIFF_TAC);;
e (REWRITE_TAC [REAL_SUB_LDISTRIB]);;
e (SUBGOAL_THEN `A0 * k1 / (k2 - k1) * (--k1 * &1) * exp (--k1 * t) = k1 * A0 * exp (--k1 * t) -
 (k2 * A0 * k1 / (k2 - k1) * exp (--k1 * t))` ASSUME_TAC);;
      e (REWRITE_TAC [real_div]);;
      e (ONCE_REWRITE_TAC [REAL_MUL_ASSOC]);;
      e (ONCE_REWRITE_TAC [GSYM REAL_SUB_RDISTRIB]);;
      e (ONCE_REWRITE_TAC [REAL_MUL_ASSOC]);;
      e (ONCE_REWRITE_TAC [GSYM REAL_SUB_RDISTRIB]);;
      e (REWRITE_TAC [REAL_EQ_MUL_RCANCEL]);;
      e (DISJ1_TAC);;
      e (SUBGOAL_THEN `k1 * A0 - ((k2:real * A0) * k1) * inv (k2 - k1) 
                = k1 * A0 * (k2 - k1) * inv (k2 - k1)  - ((k2 * A0) * k1) * inv (k2 - k1)` ASSUME_TAC);;
            e (SUBGOAL_THEN `(k2 - k1) * inv (k2 - k1) = &1` ASSUME_TAC);;
	          e (MATCH_MP_TAC REAL_MUL_RINV);;
		  e (ASM_SIMP_TAC []);;

      e (ASM_REWRITE_TAC []);;
      e (REAL_ARITH_TAC);;

      e (ONCE_REWRITE_TAC [REAL_MUL_ASSOC]);;
      e (ASM_REWRITE_TAC []);;
      e (POP_ASSUM (K ALL_TAC));;
      e (ONCE_REWRITE_TAC [REAL_MUL_ASSOC]);;
      e (ONCE_REWRITE_TAC [REAL_MUL_ASSOC]);;
      e (ONCE_REWRITE_TAC [GSYM REAL_SUB_RDISTRIB]);;
      e (REAL_ARITH_TAC);;

      e (ASM_REWRITE_TAC []);;
      e (REAL_ARITH_TAC);;

e (MATCH_MP_TAC HAS_REAL_DERIVATIVE_DERIVATIVE);;
e (REAL_DIFF_TAC);;
e (REWRITE_TAC [REAL_SUB_LDISTRIB]);;
e (SUBGOAL_THEN `A0 * &0 -  A0 * k2 / (k2 - k1) * (--k1 * &1) * exp (--k1 * t) = 
                           A0 * k2 * k1 / (k2 - k1) * exp (--k1 * t)` ASSUME_TAC);;
      e (REAL_ARITH_TAC);;

e (ASM_REWRITE_TAC []);;
e (POP_ASSUM (K ALL_TAC));;
e (SUBGOAL_THEN `A0 * k1 / (k1 - k2) * (--k2 * &1) * exp (--k2 * t) = 
                           k2 * A0 * k1 / (k2 - k1) * exp (--k2 * t)` ASSUME_TAC);;

      e (SUBGOAL_THEN `(k1 - k2:real) = --(k2 - k1)` ASSUME_TAC);;
            e (REWRITE_TAC [REAL_EQ_SUB_RADD]);;
            e (ONCE_REWRITE_TAC [REAL_ADD_SYM]);;
            e (ONCE_REWRITE_TAC [REAL_ARITH `!a:real b. a + --b = a - b`]);;
            e (REAL_ARITH_TAC);;

      e (ASM_REWRITE_TAC []);;
      e (POP_ASSUM (K ALL_TAC));;
      e (SUBGOAL_THEN `(((A0 * k1:real / --(k2 - k1)) * --k2) * &1) 
                               = k2 * A0 * k1 / (k2 - k1)` ASSUME_TAC);;
            e (REWRITE_TAC [real_div]);;
	    e (REWRITE_TAC [REAL_INV_NEG]);;   
            e (REAL_ARITH_TAC);;

      e (ASM_REWRITE_TAC [REAL_MUL_ASSOC]);;
      e (ASM_REWRITE_TAC []);;
      e (REAL_ARITH_TAC);;

let ODE_SOL_REA_SCH_01_LEMMA = top_thm();;


g `! A B C t k1 k2. 
     (&0 < k1) /\ (&0 < k2) /\ ~(k2 = k1) /\
     (A (&0) = A0) /\ (B (&0) = &0) /\ (C (&0) = &0) /\
     (!t. A t = A0 * exp (--k1 * t)) /\
     (!t. B t = A0 * ((k1 / (k2 - k1)) * (exp (--k1 * t) - exp (--k2 * t)))) /\
     (!t. C t = A0 * (&1 - ((k2 / (k2 - k1)) * (exp (--k1 * t))) - 
                           ((k1 / (k1 - k2)) * (exp (--k2 * t))))) 
               ==>
      ((entities_deriv_vec [A;B;C] t):real^3) =
        transp((st_matrix (rea_sch_01 A B C k1 k2 t)):real^3^2) ** 
                  flux (rea_sch_01 A B C k1 k2 t)`;;

e (REWRITE_TAC [ENTITIES_DERIVATIVE_VEC]);;
e (REWRITE_TAC [ST_MATRIX_REA_SCH_01]);;
e (REWRITE_TAC [FLUX_VECTOR_REA_SCH_01]);;
e (REPEAT STRIP_TAC);;
e (REWRITE_TAC [REAL_ARITH `(&0 - &1) = --(&1)`]);;
e (REWRITE_TAC [REAL_ARITH `(&1 - &0) = &1`]);;
e (REWRITE_TAC [REAL_ARITH `(&0 - &0) = &0`]);;
e (REWRITE_TAC [MAT3X2_VECTOR_MUL]);;
e (REWRITE_TAC [REAL_ARITH `!x. &0 * x = &0`]);;
e (REWRITE_TAC [REAL_ARITH `!x. -- &1 * x = -- x`]);;
e (REWRITE_TAC [REAL_ARITH `!x. &1 * x = x`]);;
e (REWRITE_TAC [REAL_NEG_LMUL]);;
e (REWRITE_TAC [REAL_ARITH `!x y z w:real. x * w + --y * z = x * w - y * z`]);;
e (REWRITE_TAC [REAL_ARITH `!x. &0 + x = x`]);;
e (REWRITE_TAC [REAL_ARITH `!x. x + &0 = x`]);;
e (ONCE_REWRITE_TAC [DERIV_ABST]);;
e (REWRITE_TAC [VECTOR3_EQ]);;
e (MATCH_MP_TAC ODE_SOL_REA_SCH_01_LEMMA);;
e (ASM_REWRITE_TAC []);;
e (ASM_REAL_ARITH_TAC);;

let ODE_SOL_REA_SCH_01 = top_thm ();;

(*===========================================================================*)
(*                            Reaction Scheme 02                             *)
(*---------------------------------------------------------------------------*)
(*     The Consecutive Reactions with the Second Step being Reversible       *)
(*===========================================================================*)

let rea_sch_02 = new_definition`
   rea_sch_02 A B C k1 k2 k3 t = 
  [(irreversible, ([(1,A t); (0,B t); (0,C t)], [(0,A t); (1,B t); (0,C t)], (k1,&0))) ;
   (reversible, ([(0,A t); (1,B t); (0,C t)], [(0,A t); (0,B t); (1,C t)], (k2,k3)))]`;;


g `!A B C k1 k2 k3 t. 
    transp((st_matrix (rea_sch_02 A B C k1 k2 k3 t)):real^3^2) = 
       vector [vector [&0 - &1; &0 - &0]; 
               vector [&1 - &0; &0 - &1]; 
	       vector [&0 - &0; &1 - &0]]`;;

e (KINETIC_SIMP [rea_sch_02; TRANSP_2X3_MAT_LEMMA]);;

let ST_MATRIX_REA_SCH_02 = top_thm();;


g `flux (rea_sch_02 A B C k1 k2 k3 t) = 
     vector [k1 * A t; k2 * B t - k3 * C t]`;;

e (KINETIC_SIMP [rea_sch_02]);;

let FLUX_VECTOR_REA_SCH_02 = top_thm();;


g `! A B C t k1 k2 k3. 
     (&0 < k1) /\ (&0 < k2) /\ (&0 < k3) /\
     (A (&0) = A0) /\ (B (&0) = &0) /\ (C (&0) = &0) /\
     (r1 = k1) /\ (r2 = k2 + k3) /\ ~(r1 = r2) /\
     (!t. A t = A0 * exp (--k1 * t)) /\
     (!t. B t = k1 * A0 * ( (k3 / (r1 * r2) ) 
       + (((r2 - k3) / (r2 * (r1 - r2))) * exp (--r2 * t))    
         + (((k3 - r1) / (r1 * (r1 - r2))) * exp (--r1 * t) ) ) ) /\
     (!t. C t =   k1 * k2 * A0 * ( ((&1) / (r1 * r2) ) 
       + (((&1) / (r1 * (r1 - r2))) * exp (--r1 * t))    
         - (((&1) / (r2 * (r1 - r2))) * exp (--r2 * t) ) )) 
               ==>
    (real_derivative (\t. A t) t = (-- k1 * A t)) /\
    (real_derivative (\t. B t) t = (k1 * A t - (k2 * B t - k3 * C t))) /\
    (real_derivative (\t. C t) t = (k2 * B t - k3 * C t)) `;;

e (SIMP_TAC []);;
e (REPEAT STRIP_TAC);;
e (MATCH_MP_TAC HAS_REAL_DERIVATIVE_DERIVATIVE);;
e (REAL_DIFF_TAC);;
e (REAL_ARITH_TAC);;

e (MATCH_MP_TAC HAS_REAL_DERIVATIVE_DERIVATIVE);;
e (REAL_DIFF_TAC);;

e (UNDISCH_TAC `r1 = k1:real`);;
e (UNDISCH_TAC `r2 = k2 + k3:real`);;
e (ONCE_REWRITE_TAC [EQ_SYM_EQ]);;
e (SIMP_TAC []);;
e (REPEAT DISCH_TAC);;
e (ONCE_REWRITE_TAC [EQ_SYM_EQ]);;
e (SUBGOAL_THEN `r1 * A0 * (&0 +
  (r2 - k3) / (r2 * (r1 - r2)) * (--r2 * &1) * exp (--r2 * t) +
  (k3 - r1) / (r1 * (r1 - r2)) * (--r1 * &1) * exp (--r1 * t)) =
r1 * A0 * ((r1 - k3) / (r1 - r2) * exp (--r1 * t) -
  k2 / (r1 - r2) * exp (--r2 * t))` ASSUME_TAC);;
e (UNDISCH_TAC `k2 + k3 = r2:real`);;
e (ONCE_REWRITE_TAC [EQ_SYM_EQ]);;
e (SIMP_TAC []);;
e (DISCH_TAC);;
e (REWRITE_TAC [REAL_EQ_MUL_LCANCEL]);;
e (REPEAT DISJ2_TAC);;
e (REWRITE_TAC [REAL_ARITH `((k2 + k3) - k3) = k2:real`]);;
e (POP_ASSUM MP_TAC);;
e (ONCE_REWRITE_TAC [EQ_SYM_EQ]);;
e (SIMP_TAC []);;
e (DISCH_TAC);;
e (SUBGOAL_THEN `(k3 - r1) / (r1 * (r1 - r2)) * (--r1 * &1) * exp (--r1 * t) = 
  		     (r1 - k3) / (r1 - r2) * exp (--r1 * t)` ASSUME_TAC);;
      e (REWRITE_TAC [REAL_MUL_ASSOC]);;
      e (REWRITE_TAC [REAL_EQ_MUL_RCANCEL]);;
      e (DISJ1_TAC);;
      e (REWRITE_TAC [real_div]);;
      e (REWRITE_TAC [REAL_INV_MUL]);;
      e (REWRITE_TAC [REAL_ARITH `(((k3 - r1:real) * inv r1 * inv (r1 - r2)) * --r1) * &1
      		     		 = (r1 * inv r1) * ((r1 - k3) * inv (r1 - r2))`]);;
      e (SUBGOAL_THEN `(r1 * inv r1) = &1` ASSUME_TAC);;
            e (MATCH_MP_TAC REAL_MUL_RINV);;
	    e (UNDISCH_TAC `k1 = r1:real`);;
	    e (ONCE_REWRITE_TAC [EQ_SYM_EQ]);;
	    e (SIMP_TAC []);;
	    e (DISCH_TAC);;
	    e (REWRITE_TAC [REAL_NOT_EQ]);;
      	    e (DISJ1_TAC);;
	    e (ASM_REWRITE_TAC []);;

      e (ASM_REWRITE_TAC []);;
      e (CONV_TAC REAL_FIELD);;

e (ASM_REWRITE_TAC []);;
e (SUBGOAL_THEN `k2 / (r2 * (r1 - r2)) * (--r2 * &1) * exp (--r2 * t) = 
  		     -- k2 / (r1 - r2) * exp (--r2 * t)` ASSUME_TAC);;
      e (REWRITE_TAC [REAL_MUL_ASSOC]);;
      e (REWRITE_TAC [REAL_EQ_MUL_RCANCEL]);;
      e (DISJ1_TAC);;
      e (REWRITE_TAC [real_div]);;
      e (REWRITE_TAC [REAL_INV_MUL]);;
      e (REWRITE_TAC [REAL_ARITH `(((k2:real) * inv r2 * inv (r1 - r2)) * --r2) * &1
      		     		 = -- (r2 * inv r2) * (k2 * inv (r1 - r2))`]);;
      e (SUBGOAL_THEN `(r2 * inv r2) = &1` ASSUME_TAC);;
            e (MATCH_MP_TAC REAL_MUL_RINV);;
	    e (UNDISCH_TAC `k2 + k3 = r2:real`);;
	    e (ONCE_REWRITE_TAC [EQ_SYM_EQ]);;
	    e (SIMP_TAC []);;
	    e (DISCH_TAC);;
	    e (REWRITE_TAC [REAL_NOT_EQ]);;
      	    e (DISJ1_TAC);;
	    e (ASM_REAL_ARITH_TAC);;

      e (ASM_REWRITE_TAC []);;
      e (CONV_TAC REAL_FIELD);;

e (ASM_REWRITE_TAC []);;
e (CONV_TAC REAL_FIELD);;

e (ASM_REWRITE_TAC []);;
e (POP_ASSUM (K ALL_TAC));;
e (ONCE_REWRITE_TAC [EQ_SYM_EQ]);;
e (REWRITE_TAC [REAL_ARITH `r1 * A0 * exp (--r1 * t) -
 (k2 *
  r1 *
  A0 *
  (k3 / (r1 * r2) +
   (r2 - k3) / (r2 * (r1 - r2)) * exp (--r2 * t) +
   (k3 - r1) / (r1 * (r1 - r2)) * exp (--r1 * t)) -
  k3 *
  r1 *
  k2 *
  A0 *
  (&1 / (r1 * r2) +
   &1 / (r1 * (r1 - r2)) * exp (--r1 * t) -
   &1 / (r2 * (r1 - r2)) * exp (--r2 * t))) = (r1 * A0 * ((&1 - (k2 * (k3 - r1)) / (r1 * (r1 - r2)) +
    (k3 * k2) / (r1 * (r1 - r2)) ) * exp (--r1 * t) -
   ((k2 * (r2 - k3)) / (r2 * (r1 - r2)) +
   (k3 * k2) / (r2 * (r1 - r2))) * exp (--r2 * t)))`]);;
e (REWRITE_TAC [REAL_EQ_MUL_LCANCEL]);;
e (REPEAT DISJ2_TAC);;
e (SUBGOAL_THEN `((k2 * (r2 - k3)) / (r2 * (r1 - r2)) + (k3 * k2) / (r2 * (r1 - r2)))
 * exp (--r2 * t) = k2 / (r1 - r2) * exp (--r2 * t)` ASSUME_TAC);;
      e (REWRITE_TAC [real_div]);;
      e (REWRITE_TAC [REAL_INV_MUL]);;
      e (REWRITE_TAC [REAL_EQ_MUL_RCANCEL]);;
      e (DISJ1_TAC);;
      e (REWRITE_TAC [REAL_MUL_ASSOC]);;
      e (REWRITE_TAC [GSYM REAL_ADD_RDISTRIB]);;
      e (REWRITE_TAC [REAL_EQ_MUL_RCANCEL]);;
      e (DISJ1_TAC);;
      e (REWRITE_TAC [REAL_ARITH `(k2 * (r2 - k3) + k3:real * k2) = (k2 * r2)`]);;
      e (REWRITE_TAC [GSYM REAL_MUL_ASSOC]);;
      e (SUBGOAL_THEN `(r2 * inv r2) = &1` ASSUME_TAC);;
            e (MATCH_MP_TAC REAL_MUL_RINV);;
	    e (UNDISCH_TAC `k2 + k3 = r2:real`);;
	    e (ONCE_REWRITE_TAC [EQ_SYM_EQ]);;
	    e (SIMP_TAC []);;
	    e (DISCH_TAC);;
	    e (REWRITE_TAC [REAL_NOT_EQ]);;
      	    e (DISJ1_TAC);;
	    e (ASM_REAL_ARITH_TAC);;

      e (ASM_REWRITE_TAC []);;
      e (CONV_TAC REAL_FIELD);;

e (ASM_REWRITE_TAC []);;
e (POP_ASSUM (K ALL_TAC));;
e (SUBGOAL_THEN `(&1 - (k2 * (k3 - r1)) / (r1 * (r1 - r2)) + (k3 * k2) / (r1 * (r1 - r2))) *
 exp (--r1 * t) = (r1 - k3) / (r1 - r2) * exp (--r1 * t)` ASSUME_TAC);;
      e (REWRITE_TAC [real_div]);;
      e (REWRITE_TAC [REAL_INV_MUL]);;
      e (REWRITE_TAC [REAL_EQ_MUL_RCANCEL]);;
      e (DISJ1_TAC);;
      e (SUBGOAL_THEN `&1 = (r1 * inv (r1)) * (r1 - r2) * inv (r1 -r2) ` ASSUME_TAC);;
            e (SUBGOAL_THEN `r1 * inv r1 = &1` ASSUME_TAC);;
                  e (MATCH_MP_TAC REAL_MUL_RINV);;
	    	  e (UNDISCH_TAC `k1 = r1:real`);;
	    	  e (ONCE_REWRITE_TAC [EQ_SYM_EQ]);;
	    	  e (SIMP_TAC []);;
	    	  e (DISCH_TAC);;
	    	  e (REWRITE_TAC [REAL_NOT_EQ]);;
      	    	  e (DISJ1_TAC);;
	    	  e (ASM_REAL_ARITH_TAC);;

            e (ASM_REWRITE_TAC []);;
            e (SUBGOAL_THEN `(r1 - r2) * inv (r1 - r2) = &1` ASSUME_TAC);;
                  e (MATCH_MP_TAC REAL_MUL_RINV);;
	    	  e (ASM_REAL_ARITH_TAC);;

            e (ASM_REWRITE_TAC []);;

      e (CONV_TAC REAL_FIELD);;
      e (ASM_REWRITE_TAC []);;
      e (POP_ASSUM (K ALL_TAC));;
      e (REWRITE_TAC [REAL_MUL_ASSOC]);;
      e (REWRITE_TAC [GSYM REAL_SUB_RDISTRIB]);;
      e (REWRITE_TAC [GSYM REAL_ADD_RDISTRIB]);;
      e (REWRITE_TAC [REAL_EQ_MUL_RCANCEL]);;
      e (DISJ1_TAC);;
      e (SUBGOAL_THEN `r1 * inv r1 = &1` ASSUME_TAC);;
            e (MATCH_MP_TAC REAL_MUL_RINV);;
	    e (UNDISCH_TAC `k1 = r1:real`);;
	    e (ONCE_REWRITE_TAC [EQ_SYM_EQ]);;
	    e (SIMP_TAC []);;
	    e (DISCH_TAC);;
	    e (REWRITE_TAC [REAL_NOT_EQ]);;
      	    e (DISJ1_TAC);;
	    e (ASM_REAL_ARITH_TAC);;

      e (ASM_REWRITE_TAC []);;
      e (REWRITE_TAC [REAL_ARITH `(&1 * (r1 - r2) - (k2 * (k3 - r1)) * inv r1 + (k3 * k2) * inv r1) = 
      		     		 (r1 - r2) + k2 * r1 * inv r1`]);;
      e (ASM_REWRITE_TAC []);;
      e (ASM_REAL_ARITH_TAC);;

e (ASM_REWRITE_TAC []);;

e (MATCH_MP_TAC HAS_REAL_DERIVATIVE_DERIVATIVE);;
e (REAL_DIFF_TAC);;
e (SUBGOAL_THEN `(k1 * k2 * A0 * (&0 +
  &1 / (r1 * (r1 - r2)) * (--r1 * &1) * exp (--r1 * t) -
    &1 / (r2 * (r1 - r2)) * (--r2 * &1) * exp (--r2 * t))) = 
      ( k1 * k2 * A0 * ((&1 / (r1 - r2)) * exp (--r2 * t) 
        - (&1 / (r1 - r2)) * exp (--r1 * t)) )` ASSUME_TAC);;
      e (REWRITE_TAC [real_div]);;
      e (REWRITE_TAC [REAL_EQ_MUL_LCANCEL]);;
      e (DISJ2_TAC);;
      e (DISJ2_TAC);;
      e (DISJ2_TAC);;
      e (REWRITE_TAC [REAL_INV_MUL]);;
      e (SUBGOAL_THEN `!x:real. (&1 * inv x * inv (r1 - r2)) * (--x * &1) * exp (--x * t) 
                 =  (&1 * inv x * x * inv (r1 - r2)) * (-- (&1)) * exp (--x * t)` ASSUME_TAC);;
            e (REAL_ARITH_TAC);;

      e (POP_ASSUM MP_TAC);;
      e (SIMP_TAC []);;
      e (DISCH_TAC);;
      e (POP_ASSUM (K ALL_TAC));;
      e (ONCE_REWRITE_TAC [REAL_MUL_ASSOC]);;
      e (ONCE_REWRITE_TAC [REAL_MUL_ASSOC]);;
      e (REWRITE_TAC [REAL_ARITH `!x. (&1 * inv x) = inv x`]);;
      e (ONCE_REWRITE_TAC [REAL_MUL_ASSOC]);;
      e (SUBGOAL_THEN `(inv r1 * r1) = &1` ASSUME_TAC);;
            e (MATCH_MP_TAC REAL_MUL_LINV);;
	    e (REWRITE_TAC [REAL_NOT_EQ]);;
	    e (DISJ2_TAC);;
	    e (ASM_REWRITE_TAC []);;

      e (POP_ASSUM MP_TAC);;
      e (SIMP_TAC []);;
      e (DISCH_TAC);;
      e (POP_ASSUM (K ALL_TAC));;
      e (SUBGOAL_THEN `(inv r2 * r2) = &1` ASSUME_TAC);;
            e (MATCH_MP_TAC REAL_MUL_LINV);;
	    e (REWRITE_TAC [REAL_NOT_EQ]);;
	    e (DISJ2_TAC);;
      	    e (ASM_REAL_ARITH_TAC);;

      e (POP_ASSUM MP_TAC);;
      e (SIMP_TAC []);;
      e (DISCH_TAC);;
      e (POP_ASSUM (K ALL_TAC));;
      e (REAL_ARITH_TAC);;

e (POP_ASSUM MP_TAC);;
e (ONCE_REWRITE_TAC [EQ_SYM_EQ]);;
e (UNDISCH_TAC `r1 = k1:real`);;
e (UNDISCH_TAC `r2 = k2 + k3:real`);;
e (ONCE_REWRITE_TAC [EQ_SYM_EQ]);;
e (SIMP_TAC []);;
e (REPEAT DISCH_TAC);;
e (POP_ASSUM (K ALL_TAC));;
e (ONCE_REWRITE_TAC [EQ_SYM_EQ]);;
e (REWRITE_TAC [REAL_ARITH `(k2 * r1 * A0 *
 (k3 / (r1 * r2) + (r2 - k3) / (r2 * (r1 - r2)) * exp (--r2 * t) +
  (k3 - r1) / (r1 * (r1 - r2)) * exp (--r1 * t)) -
 k3 * r1 * k2 * A0 *
 (&1 / (r1 * r2) +
  &1 / (r1 * (r1 - r2)) * exp (--r1 * t) -
  &1 / (r2 * (r1 - r2)) * exp (--r2 * t))) = (r1 * k2 * A0 * ( (k3 / (r1 * r2) +
  (r2 - k3) / (r2 * (r1 - r2)) * exp (--r2 * t) +
  (k3 - r1) / (r1 * (r1 - r2)) * exp (--r1 * t)) -
 k3 * (&1 / (r1 * r2) +
  &1 / (r1 * (r1 - r2)) * exp (--r1 * t) -
  &1 / (r2 * (r1 - r2)) * exp (--r2 * t)) ))`]);;
e (REWRITE_TAC [REAL_EQ_MUL_LCANCEL]);;
e (REPEAT DISJ2_TAC);;
e (REWRITE_TAC [REAL_ARITH `!a:real b c d. a * (b + c - d) = a * b + a * c - a * d`]);;
e (REWRITE_TAC [REAL_ARITH `!a:real b c d. a - (b + c - d) = a - b - c + d`]);;
e (REWRITE_TAC [REAL_ARITH `!a:real b c d. a * &1 / b = a / b`]);;
e (REWRITE_TAC [REAL_ARITH `!a:real b c d e. (a + b + c) - a - d + e = b + e + c - d`]);;
e (REWRITE_TAC [real_div]);;
e (ONCE_REWRITE_TAC [REAL_MUL_ASSOC]);;
e (ONCE_REWRITE_TAC [GSYM REAL_SUB_RDISTRIB]);;
e (SUBGOAL_THEN `((k3 - r1) * inv (r1 * (r1 - r2)) - k3 * &1 * inv (r1 * (r1 - r2))) *
 exp (--r1 * t) = -- ((&1 * inv (r1 - r2)) * exp (--r1 * t))` ASSUME_TAC);;
      e (REWRITE_TAC [GSYM REAL_MUL_LNEG]);;
      e (REWRITE_TAC [REAL_EQ_MUL_RCANCEL]);;
      e (DISJ1_TAC);;
      e (REWRITE_TAC [REAL_INV_MUL]);;
      e (REWRITE_TAC [REAL_MUL_ASSOC]);;
      e (ONCE_REWRITE_TAC [GSYM REAL_SUB_RDISTRIB]);;
      e (REWRITE_TAC [REAL_EQ_MUL_RCANCEL]);;
      e (DISJ1_TAC);;
      e (ONCE_REWRITE_TAC [GSYM REAL_SUB_RDISTRIB]);;
      e (REWRITE_TAC [REAL_ARITH `(k3 - r1 - k3 * &1) = -- r1`]);;
      e (REWRITE_TAC [REAL_MUL_LNEG]);;
      e (SUBGOAL_THEN `(r1 * inv r1) = &1` ASSUME_TAC);;
            e (MATCH_MP_TAC REAL_MUL_RINV);;
	    e (POP_ASSUM MP_TAC);;
	    e (ONCE_REWRITE_TAC [EQ_SYM_EQ]);;
	    e (SIMP_TAC []);;
	    e (DISCH_TAC);;
	    e (REWRITE_TAC [REAL_NOT_EQ]);;
      	    e (DISJ1_TAC);;
	    e (ASM_REWRITE_TAC []);;

      e (ASM_REWRITE_TAC []);;

e (ASM_REWRITE_TAC []);;
e (POP_ASSUM (K ALL_TAC));;
e (REWRITE_TAC [REAL_ARITH `!a:real b c. a + b + (--c) = a + b - c`]);;
e (REWRITE_TAC [REAL_EQ_SUB_LADD]);;
e (REWRITE_TAC [REAL_ARITH `!a:real b c. (a + b - c) + c = a + b`]);;
e (REWRITE_TAC [GSYM REAL_ADD_RDISTRIB]);;
e (REWRITE_TAC [REAL_INV_MUL]);;
e (REWRITE_TAC [REAL_MUL_ASSOC]);;
e (REWRITE_TAC [GSYM REAL_ADD_RDISTRIB]);;
e (REWRITE_TAC [REAL_MUL_ASSOC]);;
e (REWRITE_TAC [REAL_EQ_MUL_RCANCEL]);;
e (REPEAT DISJ1_TAC);;
e (REWRITE_TAC [REAL_ARITH `(r2 - k3 + k3 * &1) = r2`]);;
e (MATCH_MP_TAC REAL_MUL_RINV);;
e (UNDISCH_TAC `k2 + k3 = r2:real`);;
e (ONCE_REWRITE_TAC [EQ_SYM_EQ]);;
e (SIMP_TAC []);;
e (DISCH_TAC);;
e (REWRITE_TAC [REAL_NOT_EQ]);;
e (DISJ1_TAC);;
e (ASM_REAL_ARITH_TAC);;

let ODE_SOL_REA_SCH_02_LEMMA = top_thm ();;


g `! A B C t k1 k2 k3. 
     (&0 < k1) /\ (&0 < k2) /\ (&0 < k3) /\
     (A (&0) = A0) /\ (B (&0) = &0) /\ (C (&0) = &0) /\
     (r1 = k1) /\ (r2 = k2 + k3) /\ ~(r1 = r2) /\
     (!t. A t = A0 * exp (--k1 * t)) /\
     (!t. B t = k1 * A0 * ( (k3 / (r1 * r2) ) 
       + (((r2 - k3) / (r2 * (r1 - r2))) * exp (--r2 * t))    
         + (((k3 - r1) / (r1 * (r1 - r2))) * exp (--r1 * t) ) ) ) /\
     (!t. C t =   k1 * k2 * A0 * ( ((&1) / (r1 * r2) ) 
       + (((&1) / (r1 * (r1 - r2))) * exp (--r1 * t))    
         - (((&1) / (r2 * (r1 - r2))) * exp (--r2 * t) ) )) 
               ==>
      ((entities_deriv_vec [A;B;C] t):real^3) =
        transp((st_matrix (rea_sch_02 A B C k1 k2 k3 t)):real^3^2) ** 
                  flux (rea_sch_02 A B C k1 k2 k3 t)`;;

e (REWRITE_TAC [ENTITIES_DERIVATIVE_VEC]);;
e (REWRITE_TAC [ST_MATRIX_REA_SCH_02]);;
e (REWRITE_TAC [FLUX_VECTOR_REA_SCH_02]);;
e (REPEAT STRIP_TAC);;
e (REWRITE_TAC [REAL_ARITH `(&0 - &1) = --(&1)`]);;
e (REWRITE_TAC [REAL_ARITH `(&1 - &0) = &1`]);;
e (REWRITE_TAC [REAL_ARITH `(&0 - &0) = &0`]);;
e (REWRITE_TAC [MAT3X2_VECTOR_MUL]);;
e (REWRITE_TAC [REAL_ARITH `!x. &0 * x = &0`]);;
e (REWRITE_TAC [REAL_ARITH `!x. -- &1 * x = -- x`]);;
e (REWRITE_TAC [REAL_ARITH `!x. &1 * x = x`]);;
e (REWRITE_TAC [REAL_NEG_LMUL]);;
e (REWRITE_TAC [REAL_ARITH `!x. &0 + x = x`]);;
e (REWRITE_TAC [REAL_ARITH `!x. x + &0 = x`]);;
e (REWRITE_TAC [REAL_ARITH `!x y z:real. x + -- (y - z) = x - (y - z)`]);;
e (ONCE_REWRITE_TAC [DERIV_ABST]);;
e (REWRITE_TAC [VECTOR3_EQ]);;
e (MATCH_MP_TAC ODE_SOL_REA_SCH_02_LEMMA);;
e (ASM_REWRITE_TAC []);;

let ODE_SOL_REA_SCH_02 = top_thm ();;

(*===========================================================================*)
(*                           Reaction Scheme 03                              *)
(*---------------------------------------------------------------------------*)
(*    The Consecutive Reactions with First Step as a Reversible Reaction     *)
(*===========================================================================*)

let rea_sch_03 = new_definition`
   rea_sch_03 A B C k1 k2 k3 t = 
  [(reversible, ([(1,A t); (0,B t); (0,C t)], [(0,A t); (1,B t); (0,C t)], (k1,k2))) ;
   (irreversible, ([(0,A t); (1,B t); (0,C t)], [(0,A t); (0,B t); (1,C t)], (k3,&0)))]`;;


g `!A B C k1 k2 k3 t. 
    transp((st_matrix (rea_sch_03 A B C k1 k2 k3 t)):real^3^2) = 
       vector [vector [&0 - &1; &0 - &0]; 
               vector [&1 - &0; &0 - &1]; 
	       vector [&0 - &0; &1 - &0]]`;;

e (KINETIC_SIMP [rea_sch_03; TRANSP_2X3_MAT_LEMMA]);;

let ST_MATRIX_REA_SCH_03 = top_thm();;


g `flux (rea_sch_03 A B C k1 k2 k3 t) = 
      vector [k1 * A t - k2 * B t; k3 * B t]`;;

e (KINETIC_SIMP [rea_sch_03]);;

let FLUX_VECTOR_REA_SCH_03 = top_thm();;


g `! A B C t k1 k2 k3. 
     (&0 < k1) /\ (&0 < k2) /\ (&0 < k3) /\
     (A (&0) = A0) /\ (B (&0) = &0) /\ (C (&0) = &0) /\
     (r1 * r2 = k1 * k3) /\ (r1 + r2 = k1 + k2 + k3) /\ 
     ~(r1 = &0) /\ ~(r2 = &0) /\ ~(r1 = r2) /\
     (!t. A t = (A0 / (r2 - r1)) * 
     ( (k2 + k3 - r1) * exp (--r1 * t) - (k2 + k3 - r2) * exp (--r2 * t) ) ) /\
     (!t. B t = ((A0 * k1) / (r2 - r1)) * (exp (--r1 * t) - exp (--r2 * t)  ) ) /\
     (!t. C t =  A0 * (&1 + (k1 * k3) / (r1 * (r1 - r2)) * exp (--r1 * t) 
               + (k1 * k3) / (r2 * (r2 - r1)) * exp (--r2 * t)) )
               ==>
    (real_derivative (\t. A t) t = (-- k1 * A t + k2 * B t)) /\
    (real_derivative (\t. B t) t = (k1 * A t - k2 * B t - k3 * B t)) /\
    (real_derivative (\t. C t) t = (k3 * B t))`;;

e (SIMP_TAC []);;
e (REPEAT STRIP_TAC);;
e (MATCH_MP_TAC HAS_REAL_DERIVATIVE_DERIVATIVE);;
e (REAL_DIFF_TAC);;
e (SUBGOAL_THEN `A0 / (r2 - r1) *
 ((k2 + k3 - r1) * (--r1 * &1) * exp (--r1 * t) -
  (k2 + k3 - r2) * (--r2 * &1) * exp (--r2 * t)) = A0 / (r2 - r1) *
 ((r2 * (r1 - k1)) * exp (--r2 * t) -
  (r1 * (r2 - k1)) * exp (--r1 * t))` ASSUME_TAC);;
      e (REWRITE_TAC [real_div]);;
      e (REWRITE_TAC [REAL_EQ_MUL_LCANCEL]);;
      e (DISJ2_TAC);;
      e (SUBGOAL_THEN `(k2 + k3 - r1) * (--r1 * &1) * exp (--r1 * t) 
                        = -- (r1 * (r2 - k1)) * exp (--r1 * t)` ASSUME_TAC);;
	    e (REWRITE_TAC [REAL_MUL_ASSOC]);;
	    e (REWRITE_TAC [REAL_EQ_MUL_RCANCEL]);;
	    e (DISJ1_TAC);;
	    e (SUBGOAL_THEN `k2 + k3 = r1 + r2 - k1:real` ASSUME_TAC);;
	          e (ASM_REAL_ARITH_TAC);;

	    e (POP_ASSUM MP_TAC);;
      	    e (CONV_TAC REAL_FIELD);;

      e (ASM_REWRITE_TAC []);;
      e (POP_ASSUM (K ALL_TAC));;
      e (SUBGOAL_THEN `(k2 + k3 - r2) * (--r2 * &1) * exp (--r2 * t) 
                    = -- (r2 * (r1 - k1)) * exp (--r2 * t)` ASSUME_TAC);;
	    e (REWRITE_TAC [REAL_MUL_ASSOC]);;
	    e (REWRITE_TAC [REAL_EQ_MUL_RCANCEL]);;
	    e (DISJ1_TAC);;
	    e (SUBGOAL_THEN `k2 + k3 = r1 + r2 - k1:real` ASSUME_TAC);;
	          e (ASM_REAL_ARITH_TAC);;

	    e (POP_ASSUM MP_TAC);;
      	    e (CONV_TAC REAL_FIELD);;

      e (ASM_REWRITE_TAC []);;
      e (CONV_TAC REAL_FIELD);;

      e (ASM_REWRITE_TAC []);;
      e (POP_ASSUM (K ALL_TAC));;
      e (ONCE_REWRITE_TAC [EQ_SYM_EQ]);;
      e (REWRITE_TAC [REAL_ARITH `(--k1 *
 A0 / (r2 - r1) *
 ((k2 + k3 - r1) * exp (--r1 * t) - (k2 + k3 - r2) * exp (--r2 * t)) +
 k2 * (A0 * k1) / (r2 - r1) * (exp (--r1 * t) - exp (--r2 * t)) ) = 
 A0 / (r2 - r1) * 
 ( k1 * (k3 - r2) * exp (--r2 * t) - k1 * (k3 - r1) * exp (--r1 * t) )`]);;
      e (REWRITE_TAC [real_div]);;
      e (REWRITE_TAC [REAL_EQ_MUL_LCANCEL]);;
      e (DISJ2_TAC);;
      e (REWRITE_TAC [REAL_MUL_ASSOC]);;
      e (REWRITE_TAC [REAL_SUB_LDISTRIB]);;
      e (UNDISCH_TAC `r1 * r2 = k1:real * k3`);;
      e (ONCE_REWRITE_TAC [EQ_SYM_EQ]);;
      e (CONV_TAC REAL_FIELD);;

e (MATCH_MP_TAC HAS_REAL_DERIVATIVE_DERIVATIVE);;
e (REAL_DIFF_TAC);;
e (CONV_TAC REAL_FIELD);;

e (MATCH_MP_TAC HAS_REAL_DERIVATIVE_DERIVATIVE);;
e (REAL_DIFF_TAC);;
e (REWRITE_TAC [REAL_ARITH `!x. &0 + x = x`]);;
e (ONCE_REWRITE_TAC [REAL_ADD_LDISTRIB]);;
e (ONCE_REWRITE_TAC [REAL_MUL_ASSOC]);;
e (ONCE_REWRITE_TAC [REAL_MUL_ASSOC]);;
e (REWRITE_TAC [real_div]);;
e (REWRITE_TAC [REAL_INV_MUL]);;
e (ONCE_REWRITE_TAC [REAL_SUB_LDISTRIB]);;
e (SUBGOAL_THEN `((A0 * (k1 * k3) * inv r1 * inv (r1 - r2)) * --r1 * &1) * exp (--r1 * t) =
                  (k3 * (A0 * k1) * inv (r2 - r1)) * exp (--r1 * t)` ASSUME_TAC);;
      e (REWRITE_TAC [REAL_EQ_MUL_RCANCEL]);;
      e (DISJ1_TAC);;
      e (ONCE_REWRITE_TAC [REAL_ARITH `( (A0 * (k1 * k3) * inv r1 * inv (r1 - r2)) * --r1 * &1
   = ((r1 * inv r1) * k3 * (A0 * k1) * -- inv (r1 - r2)) )`]);;
      e (REWRITE_TAC [GSYM REAL_INV_NEG]);;
      e (ONCE_REWRITE_TAC [REAL_ARITH `--(r1 - r2) = (r2:real - r1)`]);;
      e (SUBGOAL_THEN `(r1 * inv r1) = &1` ASSUME_TAC);;
            e (MATCH_MP_TAC REAL_MUL_RINV);;
	    e (ASM_REWRITE_TAC []);;

      e (ASM_REWRITE_TAC []);;
      e (REAL_ARITH_TAC);;

e (ASM_REWRITE_TAC []);;
e (SUBGOAL_THEN `((A0 * (k1 * k3) * inv r2 * inv (r2 - r1)) * --r2 * &1) * exp (--r2 * t)
          = -- (k3 * (A0 * k1) * inv (r2 - r1)) * exp (--r2 * t)` ASSUME_TAC);;
      e (ONCE_REWRITE_TAC [REAL_MUL_ASSOC]);;
      e (REWRITE_TAC [REAL_EQ_MUL_RCANCEL]);;
      e (DISJ1_TAC);;
      e (REWRITE_TAC [REAL_ARITH `((A0 * (k1 * k3) * inv r2 * inv (r2 - r1)) * --r2) * &1 = 
                      -- (((r2 * inv r2) * inv (r2 - r1)) * A0 * (k1 * k3))`]);;
      e (SUBGOAL_THEN `(r2 * inv r2) = &1` ASSUME_TAC);;
            e (MATCH_MP_TAC REAL_MUL_RINV);;
	    e (ASM_REWRITE_TAC []);;

      e (ASM_REWRITE_TAC []);;
      e (REAL_ARITH_TAC);;

e (ASM_REWRITE_TAC []);;
e (CONV_TAC REAL_FIELD);;

let ODE_SOL_REA_SCH_03_LEMMA = top_thm ();;


g `! A B C t k1 k2 k3. 
     (&0 < k1) /\ (&0 < k2) /\ (&0 < k3) /\
     (A (&0) = A0) /\ (B (&0) = &0) /\ (C (&0) = &0) /\
     (r1 * r2 = k1 * k3) /\ (r1 + r2 = k1 + k2 + k3) /\ 
     ~(r1 = &0) /\ ~(r2 = &0) /\ ~(r1 = r2) /\
     (!t. A t = (A0 / (r2 - r1)) * 
     ( (k2 + k3 - r1) * exp (--r1 * t) - (k2 + k3 - r2) * exp (--r2 * t) ) ) /\
     (!t. B t = ((A0 * k1) / (r2 - r1)) * (exp (--r1 * t) - exp (--r2 * t)  ) ) /\
     (!t. C t =  A0 * (&1 + (k1 * k3) / (r1 * (r1 - r2)) * exp (--r1 * t) 
               + (k1 * k3) / (r2 * (r2 - r1)) * exp (--r2 * t)) )
               ==>
      ((entities_deriv_vec [A;B;C] t):real^3) =
        transp((st_matrix (rea_sch_03 A B C k1 k2 k3 t)):real^3^2) ** 
                  flux (rea_sch_03 A B C k1 k2 k3 t)`;;

e (REWRITE_TAC [ENTITIES_DERIVATIVE_VEC]);;
e (REWRITE_TAC [ST_MATRIX_REA_SCH_03]);;
e (REWRITE_TAC [FLUX_VECTOR_REA_SCH_03]);;
e (REPEAT STRIP_TAC);;
e (REWRITE_TAC [REAL_ARITH `(&0 - &1) = --(&1)`]);;
e (REWRITE_TAC [REAL_ARITH `(&1 - &0) = &1`]);;
e (REWRITE_TAC [REAL_ARITH `(&0 - &0) = &0`]);;
e (REWRITE_TAC [MAT3X2_VECTOR_MUL]);;
e (REWRITE_TAC [REAL_ARITH `!x. &0 * x = &0`]);;
e (REWRITE_TAC [REAL_ARITH `!x. -- &1 * x = -- x`]);;
e (REWRITE_TAC [REAL_ARITH `!x. &1 * x = x`]);;
e (REWRITE_TAC [REAL_NEG_LMUL]);;
e (REWRITE_TAC [REAL_ARITH `!x. &0 + x = x`]);;
e (REWRITE_TAC [REAL_ARITH `!x. x + &0 = x`]);;
e (REWRITE_TAC [GSYM REAL_NEG_LMUL]);;
e (REWRITE_TAC [REAL_ARITH `!x y:real. (-- (x - y) ) = (-- x + y)`]);;
e (REWRITE_TAC [REAL_ARITH `!x y z:real. ((x - y) + -- z) = (x - y - z)`]);;
e (REWRITE_TAC [REAL_NEG_LMUL]);;
e (ONCE_REWRITE_TAC [DERIV_ABST]);;
e (REWRITE_TAC [VECTOR3_EQ]);;
e (MATCH_MP_TAC ODE_SOL_REA_SCH_03_LEMMA);;
e (ASM_REWRITE_TAC []);;

let ODE_SOL_REA_SCH_03 = top_thm ();;

(*===========================================================================*)
(*                            Reaction Scheme 04                             *)
(*---------------------------------------------------------------------------*)
(*               The Consecutive Reactions with a Reversible Step            *)
(*===========================================================================*)

let rea_sch_04 = new_definition`
   rea_sch_04 A B C k1 k2 k3 t = 
  [(reversible,([(1,A t); (0,B t); (0,C t)], [(0,A t); (1,B t); (0,C t)], (k1,k2)));
   (irreversible,([(1,A t); (0,B t); (0,C t)], [(0,A t); (0,B t); (1,C t)], (k3,&0)))]`;;


g `!A B C k1 k2 k3 t. 
    transp((st_matrix (rea_sch_04 A B C k1 k2 k3 t)):real^3^2) = 
       vector [vector [&0 - &1; &0 - &1]; 
               vector [&1 - &0; &0 - &0]; 
	       vector [&0 - &0; &1 - &0]]`;;

e (KINETIC_SIMP [rea_sch_04; TRANSP_2X3_MAT_LEMMA]);;

let ST_MATRIX_REA_SCH_04 = top_thm();;


g `flux (rea_sch_04 A B C k1 k2 k3 t) = 
      vector [k1 * A t - k2 * B t; k3 * A t]`;;

e (KINETIC_SIMP [rea_sch_04]);;

let FLUX_VECTOR_REA_SCH_04 = top_thm();;


g `! A B C t k1 k2 k3. 
     (&0 < k1) /\ (&0 < k2) /\ (&0 < k3) /\
     (A (&0) = A0) /\ (B (&0) = &0) /\ (C (&0) = &0) /\
     (r1 * r2 = k2 * k3) /\ (r1 + r2 = k1 + k2 + k3) /\ 
     ~(r1 = &0) /\ ~(r2 = &0) /\ ~(r1 = r2) /\
     (!t. A t =  A0 * ((k2 - r1) / (r2 - r1) * exp (--r1 * t) 
               - (k2 - r2) / (r2 - r1) * exp (--r2 * t)) ) /\
     (!t. B t = ( k1 * A0) / (r2 - r1) * (exp (--r1 * t) - exp (--r2 * t)  ) ) /\
     (!t. C t =  A0 * (&1 + (k3 * (k2 - r1)) / (r1 * (r1 - r2)) * exp (--r1 * t) 
               + (k3 * (k2 - r2)) / (r2 * (r2 - r1)) * exp (--r2 * t)) )
               ==>
    (real_derivative (\t. A t) t = (-- k1 * A t + k2 * B t - k3 * A t)) /\
    (real_derivative (\t. B t) t = (k1 * A t - k2 * B t)) /\
    (real_derivative (\t. C t) t = (k3 * A t))`;;

e (SIMP_TAC []);;
e (REPEAT STRIP_TAC);;
e (MATCH_MP_TAC HAS_REAL_DERIVATIVE_DERIVATIVE);;
e (REAL_DIFF_TAC);;

e (ONCE_REWRITE_TAC [REAL_SUB_LDISTRIB]);;
e (ONCE_REWRITE_TAC [REAL_SUB_LDISTRIB]);;
e (REWRITE_TAC [REAL_ARITH `!a b c:real. a - (b - c) = a - b + c`]);;
e (ONCE_REWRITE_TAC [EQ_SYM_EQ]);;
e (SUBGOAL_THEN `( --k1 * A0 * (k2 - r1) / (r2 - r1) * exp (--r1 * t) 
     +  k2 * (k1 * A0) / (r2 - r1) * exp (--r1 * t)
     - k3 * A0 * (k2 - r1) / (r2 - r1) * exp (--r1 * t)) =
     A0 * (k2 - r1) / (r2 - r1) * (--r1 * &1) * exp (--r1 * t)` ASSUME_TAC);;
      e (REWRITE_TAC [real_div]);;
      e (REWRITE_TAC [REAL_MUL_ASSOC]);;
      e (REWRITE_TAC [REAL_ARITH `!a b c d:real. (a * d + b * d - c * d) = ((a + b - c) * d) `]);;
      e (REWRITE_TAC [REAL_EQ_MUL_RCANCEL]);;
      e (DISJ1_TAC);;
      e (REWRITE_TAC [REAL_ARITH `(((A0 * (k2 - r1)) * inv (r2 - r1)) * --r1) * &1 =
                              ((A0 * (k2 - r1)) * --r1 * inv (r2 - r1))`]);;
      e (REWRITE_TAC [REAL_MUL_ASSOC]);;
      e (REWRITE_TAC [REAL_EQ_MUL_RCANCEL]);;
      e (DISJ1_TAC);;
      e (REWRITE_TAC [REAL_ARITH ` ((--k1 * A0) * (k2 - r1) + (k2 * k1) * A0 - (k3 * A0) * (k2 - r1)) 
           = (A0 * (r1 * (k1 + k3) - (k2:real) * k3))`]);;
      e (REWRITE_TAC [GSYM REAL_MUL_ASSOC]);;
      e (REWRITE_TAC [REAL_EQ_MUL_LCANCEL]);;
      e (DISJ2_TAC);;
      e (UNDISCH_TAC `r1 * r2:real = k2 * k3`);;
      e (UNDISCH_TAC `r1 + r2 = k1 + (k2:real) + k3`);;
      e (CONV_TAC REAL_FIELD);;

e (REWRITE_TAC [REAL_ARITH `(--k1 * A0 * (k2 - r1) / (r2 - r1) * exp (--r1 * t) -
 --k1 * A0 * (k2 - r2) / (r2 - r1) * exp (--r2 * t) +
 k2 * (k1 * A0) / (r2 - r1) * exp (--r1 * t) -
 k2 * (k1 * A0) / (r2 - r1) * exp (--r2 * t) -
 k3 * A0 * (k2 - r1) / (r2 - r1) * exp (--r1 * t) +
 k3 * A0 * (k2 - r2) / (r2 - r1) * exp (--r2 * t)) = ((--k1 * A0 * (k2 - r1) / (r2 - r1) * exp (--r1 * t) +
      k2 * (k1 * A0) / (r2 - r1) * exp (--r1 * t) -
      k3 * A0 * (k2 - r1) / (r2 - r1) * exp (--r1 * t)) 
      + k1 * A0 * (k2 - r2) / (r2 - r1) * exp (--r2 * t)
      - k2 * (k1 * A0) / (r2 - r1) * exp (--r2 * t)
      + k3 * A0 * (k2 - r2) / (r2 - r1:real) * exp (--r2 * t))`]);;

e (ASM_SIMP_TAC []);;
e (POP_ASSUM (K ALL_TAC));;
e (SUBGOAL_THEN `k1 * A0 * (k2 - r2) / (r2 - r1) * exp (--r2 * t) -
 k2 * (k1 * A0) / (r2 - r1) * exp (--r2 * t) +
 k3 * A0 * (k2 - r2) / (r2 - r1) * exp (--r2 * t) = 
 A0 * (k2 - r2) / (r2 - r1) * (r2 * &1) * exp (--r2 * t)` ASSUME_TAC);;
      e (REWRITE_TAC [real_div]);;
      e (REWRITE_TAC [REAL_MUL_ASSOC]);;
      e (REWRITE_TAC [REAL_ARITH `!a b c d:real. (a * d - b * d + c * d) = ((a - b + c) * d) `]);;
      e (REWRITE_TAC [REAL_EQ_MUL_RCANCEL]);;
      e (DISJ1_TAC);;
      e (REWRITE_TAC [REAL_ARITH `(((A0 * (k2 - r2)) * inv (r2 - r1)) * r2) * &1 =
                              ((A0 * (k2 - r2)) * r2 * inv (r2 - r1))`]);;
      e (REWRITE_TAC [REAL_MUL_ASSOC]);;
      e (REWRITE_TAC [REAL_EQ_MUL_RCANCEL]);;
      e (DISJ1_TAC);;
      e (REWRITE_TAC [REAL_ARITH ` ((k1 * A0) * (k2 - r2) - (k2 * k1) * A0 + (k3 * A0) * (k2 - r2)) 
           = (A0 * (-- r2 * (k1 + k3) + (k2:real) * k3))`]);;
      e (REWRITE_TAC [GSYM REAL_MUL_ASSOC]);;
      e (REWRITE_TAC [REAL_EQ_MUL_LCANCEL]);;
      e (DISJ2_TAC);;
      e (UNDISCH_TAC `r1 * r2:real = k2 * k3`);;
      e (UNDISCH_TAC `r1 + r2 = k1 + (k2:real) + k3`);;
      e (CONV_TAC REAL_FIELD);;

e (ASM_REWRITE_TAC []);;
e (CONV_TAC REAL_FIELD);;

e (MATCH_MP_TAC HAS_REAL_DERIVATIVE_DERIVATIVE);;
e (REAL_DIFF_TAC);;

e (CONV_TAC REAL_FIELD);;

e (MATCH_MP_TAC HAS_REAL_DERIVATIVE_DERIVATIVE);;
e (REAL_DIFF_TAC);;
e (REWRITE_TAC [REAL_ARITH `!x. &0 + x = x`]);;
e (ONCE_REWRITE_TAC [REAL_ARITH `!x:real y z. x * y * z = y * x * z`]);;
e (REWRITE_TAC [REAL_EQ_MUL_LCANCEL]);;
e (DISJ2_TAC);;
e (ONCE_REWRITE_TAC [REAL_SUB_LDISTRIB]);;
e (ONCE_REWRITE_TAC [REAL_MUL_ASSOC]);;
e (SUBGOAL_THEN `((--r1 * &1) * (k3 * k2 - k3 * r1) / (r1 * r1 - r1 * r2)) * exp (--r1 * t)
         = (k3 * (k2 - r1) / (r2 - r1)) * exp (--r1 * t)` ASSUME_TAC);;
      e (REWRITE_TAC [REAL_EQ_MUL_RCANCEL]);;
      e (DISJ1_TAC);;
      e (ONCE_REWRITE_TAC [GSYM REAL_SUB_LDISTRIB]);;
      e (REWRITE_TAC [real_div]);;
      e (REWRITE_TAC [REAL_INV_MUL]);;
      e (REWRITE_TAC [REAL_ARITH `(--r1 * &1) * (k3 * (k2 - r1)) * inv r1 * inv (r1 - r2)
      		     		 = ( (r1 * inv r1) * k3 * (k2 - r1) * -- inv (r1 - r2) )`]);;
      e (REWRITE_TAC [GSYM REAL_INV_NEG]);;
      e (ONCE_REWRITE_TAC [REAL_ARITH `--(r1 - r2) = (r2:real - r1)`]);;
      e (SUBGOAL_THEN `(r1 * inv r1) = &1` ASSUME_TAC);;
            e (MATCH_MP_TAC REAL_MUL_RINV);;
	    e (ASM_REWRITE_TAC []);;

      e (ASM_REWRITE_TAC []);;
      e (REAL_ARITH_TAC);;

e (ASM_REWRITE_TAC []);;
e (POP_ASSUM (K ALL_TAC));;
e (SUBGOAL_THEN `((--r2 * &1) * (k3 * k2 - k3 * r2) / (r2 * r2 - r2 * r1)) * exp (--r2 * t)
                 = -- (k3 * (k2 - r2) / (r2 - r1)) * exp (--r2 * t)` ASSUME_TAC);;
      e (REWRITE_TAC [REAL_EQ_MUL_RCANCEL]);;
      e (DISJ1_TAC);;
      e (ONCE_REWRITE_TAC [GSYM REAL_SUB_LDISTRIB]);;
      e (REWRITE_TAC [real_div]);;
      e (REWRITE_TAC [REAL_INV_MUL]);;
      e (REWRITE_TAC [REAL_ARITH `(--r2 * &1) * (k3 * (k2 - r2)) * inv r2 * inv (r2 - r1)
      		     		 = -- ( (r2 * inv r2) * k3 * (k2 - r2) * inv (r2 - r1) )`]);;
      e (REWRITE_TAC [REAL_EQ_NEG2]);;
      e (SUBGOAL_THEN `(r2 * inv r2) = &1` ASSUME_TAC);;
            e (MATCH_MP_TAC REAL_MUL_RINV);;
	    e (ASM_REWRITE_TAC []);;

      e (ASM_REWRITE_TAC []);;
      e (REAL_ARITH_TAC);;

e (ASM_REWRITE_TAC []);;
e (CONV_TAC REAL_FIELD);;

let ODE_SOL_REA_SCH_04_LEMMA = top_thm ();;


g `! A B C t k1 k2 k3. 
     (&0 < k1) /\ (&0 < k2) /\ (&0 < k3) /\
     (A (&0) = A0) /\ (B (&0) = &0) /\ (C (&0) = &0) /\
     (r1 * r2 = k2 * k3) /\ (r1 + r2 = k1 + k2 + k3) /\ 
     ~(r1 = &0) /\ ~(r2 = &0) /\ ~(r1 = r2) /\
     (!t. A t =  A0 * ((k2 - r1) / (r2 - r1) * exp (--r1 * t) 
               - (k2 - r2) / (r2 - r1) * exp (--r2 * t)) ) /\
     (!t. B t = ( k1 * A0) / (r2 - r1) * (exp (--r1 * t) - exp (--r2 * t)  ) ) /\
     (!t. C t =  A0 * (&1 + (k3 * (k2 - r1)) / (r1 * (r1 - r2)) * exp (--r1 * t) 
               + (k3 * (k2 - r2)) / (r2 * (r2 - r1)) * exp (--r2 * t)) )
               ==>
      ((entities_deriv_vec [A;B;C] t):real^3) =
        transp((st_matrix (rea_sch_04 A B C k1 k2 k3 t)):real^3^2) ** 
                  flux (rea_sch_04 A B C k1 k2 k3 t)`;;

e (REWRITE_TAC [ENTITIES_DERIVATIVE_VEC]);;
e (REWRITE_TAC [ST_MATRIX_REA_SCH_04]);;
e (REWRITE_TAC [FLUX_VECTOR_REA_SCH_04]);;
e (REPEAT STRIP_TAC);;
e (REWRITE_TAC [REAL_ARITH `(&0 - &1) = --(&1)`]);;
e (REWRITE_TAC [REAL_ARITH `(&1 - &0) = &1`]);;
e (REWRITE_TAC [REAL_ARITH `(&0 - &0) = &0`]);;
e (REWRITE_TAC [MAT3X2_VECTOR_MUL]);;
e (REWRITE_TAC [REAL_ARITH `!x. &0 * x = &0`]);;
e (REWRITE_TAC [REAL_ARITH `!x. -- &1 * x = -- x`]);;
e (REWRITE_TAC [REAL_ARITH `!x. &1 * x = x`]);;
e (REWRITE_TAC [REAL_NEG_LMUL]);;
e (REWRITE_TAC [REAL_ARITH `!x. &0 + x = x`]);;
e (REWRITE_TAC [REAL_ARITH `!x. x + &0 = x`]);;
e (REWRITE_TAC [GSYM REAL_NEG_LMUL]);;
e (REWRITE_TAC [REAL_ARITH `!x y z:real. (-- (x - y) + -- z) = (-- x + y - z)`]);;
e (ONCE_REWRITE_TAC [DERIV_ABST]);;
e (REWRITE_TAC [VECTOR3_EQ]);;
e (REWRITE_TAC [REAL_NEG_LMUL]);;
e (MATCH_MP_TAC ODE_SOL_REA_SCH_04_LEMMA);;
e (ASM_REWRITE_TAC []);;

let ODE_SOL_REA_SCH_04 = top_thm ();;


(*---------------------------------------------------------------------------*)
(*===========================================================================*)
(*           Formalization of the Tumor Growth Model based on CSCs           *)
(*===========================================================================*)
(*---------------------------------------------------------------------------*)


(*===========================================================================*)
(*                              CASE STUDY I                                 *)
(*---------------------------------------------------------------------------*)
(*                 Tumor Growth based on Cancer Stem Cells                   *)
(*===========================================================================*)

let cancer_stem_cell =  new_definition`
    cancer_stem_cell CSC P D M k1 k2 k3 k4 k5 k6 k7 k8 t = 
  [(irreversible, ([(1,CSC t); (0,P t); (0,D t); (0,M t)],
                   [(2,CSC t); (0,P t); (0,D t); (0,M t)], (k1,&0)));
   (irreversible, ([(1,CSC t); (0,P t); (0,D t); (0,M t)],
                   [(1,CSC t); (1,P t); (0,D t); (0,M t)], (k2,&0)));
   (irreversible, ([(1,CSC t); (0,P t); (0,D t); (0,M t)],
                   [(0,CSC t); (2,P t); (0,D t); (0,M t)], (k3,&0)));
   (irreversible, ([(0,CSC t); (1,P t); (0,D t); (0,M t)],
                   [(0,CSC t); (2,P t); (0,D t); (0,M t)], (k4,&0)));
   (irreversible, ([(0,CSC t); (1,P t); (0,D t); (0,M t)],
                   [(0,CSC t); (0,P t); (2,D t); (0,M t)], (k5,&0)));
   (irreversible, ([(1,CSC t); (0,P t); (0,D t); (0,M t)],
                   [(0,CSC t); (0,P t); (0,D t); (1,M t)], (k6,&0)));
   (irreversible, ([(0,CSC t); (1,P t); (0,D t); (0,M t)],
                   [(0,CSC t); (0,P t); (0,D t); (1,M t)], (k7,&0)));
   (irreversible, ([(0,CSC t); (0,P t); (1,D t); (0,M t)],
                   [(0,CSC t); (0,P t); (0,D t); (1,M t)], (k8,&0))) ]`;;


g `!k1 k2 k3 k4 k5 k6 k7 CSC P D M t k8. 
    st_matrix (cancer_stem_cell CSC P D M k1 k2 k3 k4 k5 k6 k7 k8 t) = 
       vector
          [vector [&1; &0; &0; &0]; 
  	   vector [&0; &1; &0; &0]; 
  	   vector [-- &1; &2; &0; &0]; 
  	   vector [&0; &1; &0; &0]; 
  	   vector [&0; -- &1; &2; &0]; 
  	   vector [-- &1; &0; &0; &1]; 
  	   vector [&0; -- &1; &0; &1]; 
  	   vector [&0; &0; -- &1; &1]]`;;

e (KINETIC_SIMP [cancer_stem_cell]);;
e (SIMP_TAC [REAL_FIELD `&0 - &0 = &0`;
             REAL_FIELD `!(a:real). &0 - a = --a`; 
             REAL_FIELD `!(a:real). a - &0 = a`;
             REAL_FIELD ` &2 - &1 = &1 /\ a - a = &0`]);;

let ST_MATRIX_CSC = top_thm ();;


g `!k1 k2 k3 k4 k5 k6 k7 CSC P D M t k8.
    flux (cancer_stem_cell CSC P D M k1 k2 k3 k4 k5 k6 k7 k8 t) = 
        vector
         [k1 * CSC t; k2 * CSC t; k3 * CSC t; k4 * P t; 
	  k5 * P t; k6 * CSC t; k7 * P t; k8 * D t]`;;

e (KINETIC_SIMP [cancer_stem_cell]);;

let FLUX_VECTOR_CSC = top_thm ();;

(*===========================================================================*)
(*                         Main Lemma and  Theorem                           *)
(*===========================================================================*)

g `!k1 k2 k3 k4 k5 k6 k7 k8 t.
    ~(((--k1 + k3 + k4 - k5 + k6 - 
       k7)* (--k1 + k3 + k6 - k8) * (--k4 + k5 + k7 - k8)) = &0) /\ 
    ~((k1 - k3 - k4 + k5 - k6 + k7) = &0) 
       ==>
    real_derivative (\t. (&2 * exp(--k8 * t) * (k2 + &2* k3) *  k5 * 
    ((-- &1 + exp ((k4 - k5 - k7 + k8) * t)) * k1 + 
     k3 + k4 - k5 + k6 - k7 + 
     exp ((k1 - k3 - k6 + k8) * t) * (-- k4 + k5 + k7 - k8) + 
     exp ((k4 - k5 - k7 + k8) * t) * (--k3 - k6 + k8))) /
    ((--k1 + k3 + k4 -  k5 + k6 - k7) * 
     (--k1 + k3 + k6 - k8) * 
     (--k4 + k5 + k7 - k8))) t = 
  &2 * k5 *  ((exp ((k1 - k3 - k6) *t) - exp ((k4 - k5 - k7) * t)) * (k2 + &2* k3)) /
    (k1 - k3 - k4 + k5 - k6 + k7) - k8 * (&2 * 
     exp(--k8 * t) * (k2 + &2* k3) * k5 * 
    ((-- &1 + exp ((k4 - k5 - k7 + k8) * t)) * k1 + 
     k3 + k4 - k5 + k6 - k7 + 
     exp ((k1 - k3 - k6 + k8) * t) * (-- k4 + k5 + k7 - k8) + 
     exp ((k4 - k5 - k7 + k8) * t) * (--k3 - k6 + k8))) /
    ((--k1 + k3 + k4 -  k5 + k6 - k7) * 
     (--k1 + k3 + k6 - k8) * 
     (--k4 + k5 + k7 - k8))`;;

e (REPEAT STRIP_TAC);;
e (MATCH_MP_TAC HAS_REAL_DERIVATIVE_DERIVATIVE);;
e (REAL_DIFF_TAC);;
e (SIMP_TAC [REAL_ADD_LID; REAL_FIELD ` &0 - a = --a`; REAL_ADD_RID; REAL_MUL_RID]);;    
e (ASM_SIMP_TAC [REAL_FIELD ` ! a b c d g h k. 
             	 ~(d = &0) /\ ~(k = &0) ==> 
                  a * b * c / d  - g * ( h / k) = 
		  (a * b * c * k - g * h * d) / (d * k)`]);;
e (ASM_SIMP_TAC [REAL_FIELD `! a b c (d:real). ~(b = &0 ) /\ ~(d = &0)  
                ==>  ((a / b) = (c / (d * b))) = (a * d = c ) `; REAL_FIELD `
		((k1 - k3 - k4 + k5 - k6 + k7) *
  		(--k1 + k3 + k4 - k5 + k6 - k7) *
  		(--k1 + k3 + k6 - k8) *
  		(--k4 + k5 + k7 - k8)) = ((k1 - k3 - k4 + k5 - k6 + k7) * (
  		(--k1 + k3 + k4 - k5 + k6 - k7) *
  		(--k1 + k3 + k6 - k8) *
  		(--k4 + k5 + k7 - k8)))`]);;
e (SIMP_TAC [REAL_FIELD `! a b c. a * (b * c) = a * b * c`]);;
e (SIMP_TAC [REAL_FIELD ` (&2 * (exp (--k8 * t) * (k2 + &2 * k3) * k5 *
            (((k4 - k5 - k7 + k8) * exp ((k4 - k5 - k7 + k8) * t)) * k1 +
    	    ((k1 - k3 - k6 + k8) * exp ((k1 - k3 - k6 + k8) * t)) *
    	    (--k4 + k5 + k7 - k8) +
    	    ((k4 - k5 - k7 + k8) * exp ((k4 - k5 - k7 + k8) * t)) * (--k3 - k6 + k8)) +
   	    (--k8 * exp (--k8 * t)) * (k2 + &2 * k3) * k5 * 
	    ((-- &1 + exp ((k4 - k5 - k7 + k8) * t)) * k1 +
    	    k3 + k4 - k5 + k6 - k7 +
    	    exp ((k1 - k3 - k6 + k8) * t) * (--k4 + k5 + k7 - k8) +
    	    exp ((k4 - k5 - k7 + k8) * t) * (--k3 - k6 + k8)))) *
 	    (k1 - k3 - k4 + k5 - k6 + k7) = ((&2 * exp (--k8 * t) *
   	    (k2 + &2 * k3) * k5 *
   	    (((k4 - k5 - k7 + k8) * exp ((k4 - k5 - k7 + k8) * t)) * k1 +
    	    ((k1 - k3 - k6 + k8) * exp ((k1 - k3 - k6 + k8) * t)) *
    	    (--k4 + k5 + k7 - k8) +
    	    ((k4 - k5 - k7 + k8) * exp ((k4 - k5 - k7 + k8) * t)) * (--k3 - k6 + k8)) -
   	    &2 * (k8 * exp (--k8 * t)) *
   	    (k2 + &2 * k3) * k5 *
   	    ((-- &1 + exp ((k4 - k5 - k7 + k8) * t)) * k1 +
    	    k3 + k4 - k5 + k6 - k7 +
    	    exp ((k1 - k3 - k6 + k8) * t) * (--k4 + k5 + k7 - k8) +
    	    exp ((k4 - k5 - k7 + k8) * t) * (--k3 - k6 + k8)))) *
 	    (k1 - k3 - k4 + k5 - k6 + k7)`]);;
e (SIMP_TAC [REAL_FIELD ` (&2 * exp (--k8 * t) * (k2 + &2 * k3) * k5 *
  	    (((k4 - k5 - k7 + k8) * exp ((k4 - k5 - k7 + k8) * t)) * k1 +
   	    ((k1 - k3 - k6 + k8) * exp ((k1 - k3 - k6 + k8) * t)) *
   	    (--k4 + k5 + k7 - k8) +
   	    ((k4 - k5 - k7 + k8) * exp ((k4 - k5 - k7 + k8) * t)) * (--k3 - k6 + k8)) -
  	    &2 * (k8 * exp (--k8 * t)) * (k2 + &2 * k3) * k5 *
  	    ((-- &1 + exp ((k4 - k5 - k7 + k8) * t)) * k1 + k3 + k4 - k5 + k6 - k7 +
   	    exp ((k1 - k3 - k6 + k8) * t) * (--k4 + k5 + k7 - k8) +
   	    exp ((k4 - k5 - k7 + k8) * t) * (--k3 - k6 + k8))) *
 	    (k1 - k3 - k4 + k5 - k6 + k7)  = &2 * exp (--k8 * t) * (k2 + &2 * k3) * k5 *
  	    (((k4 - k5 - k7 + k8) * exp ((k4 - k5 - k7 + k8) * t)) * k1 +
   	    ((k1 - k3 - k6 + k8) * exp ((k1 - k3 - k6 + k8) * t)) *
   	    (--k4 + k5 + k7 - k8) +
   	    ((k4 - k5 - k7 + k8) * exp ((k4 - k5 - k7 + k8) * t)) * 
	    (--k3 - k6 + k8))*  (k1 - k3 - k4 + k5 - k6 + k7) - &2 *
  	    (k8 * exp (--k8 * t)) * (k2 + &2 * k3) * k5 *
  	    ((-- &1 + exp ((k4 - k5 - k7 + k8) * t)) * k1 + k3 + k4 - k5 + k6 - k7 +
   	    exp ((k1 - k3 - k6 + k8) * t) * (--k4 + k5 + k7 - k8) +
   	    exp ((k4 - k5 - k7 + k8) * t) * (--k3 - k6 + k8)) *
 	    (k1 - k3 - k4 + k5 - k6 + k7) `]);;
e (SIMP_TAC [REAL_FIELD `&2 * (k8 * exp (--k8 * t)) * (k2 + &2 * k3) * k5 *
  	    ((-- &1 + exp ((k4 - k5 - k7 + k8) * t)) * k1 + k3 + k4 - k5 + k6 - k7 +
  	    exp ((k1 - k3 - k6 + k8) * t) * (--k4 + k5 + k7 - k8) +
  	    exp ((k4 - k5 - k7 + k8) * t) * (--k3 - k6 + k8)) *
 	    (k1 - k3 - k4 + k5 - k6 + k7) = k8 * (&2 * exp (--k8 * t) *
  	    (k2 + &2 * k3) * k5 * ((-- &1 + exp ((k4 - k5 - k7 + k8) * t)) * k1 +
   	     k3 + k4 - k5 + k6 - k7 +
   	    exp ((k1 - k3 - k6 + k8) * t) * (--k4 + k5 + k7 - k8) +
   	    exp ((k4 - k5 - k7 + k8) * t) * (--k3 - k6 + k8))) *
 	    (k1 - k3 - k4 + k5 - k6 + k7)`]);;
e (SIMP_TAC [REAL_FIELD `!(a:real) b c. a - b = c - b <=> a = c`]);;
e (SIMP_TAC [REAL_FIELD ` &2 * exp (--k8 * t) * (k2 + &2 * k3) * k5 *
            (((k4 - k5 - k7 + k8) * exp ((k4 - k5 - k7 + k8) * t)) * k1 +
  	    ((k1 - k3 - k6 + k8) * exp ((k1 - k3 - k6 + k8) * t)) *
  	    (--k4 + k5 + k7 - k8) +
  	    ((k4 - k5 - k7 + k8) * exp ((k4 - k5 - k7 + k8) * t)) * (--k3 - k6 + k8)) *
 	    (k1 - k3 - k4 + k5 - k6 + k7) = &2 * exp (--k8 * t) * (k2 + &2 * k3) * k5 *
 	    (((k4 - k5 - k7 + k8) * exp ((k4 - k5 - k7 + k8) * t)) * (k1 - k3 - k6 + k8) +
  	    ((k1 - k3 - k6 + k8) * exp ((k1 - k3 - k6 + k8) * t)) *
  	    (--k4 + k5 + k7 - k8) ) * (k1 - k3 - k4 + k5 - k6 + k7)`]);;
e (SIMP_TAC [REAL_FIELD `(((k4:real) - k5 - k7 + k8) * t) = ((k4 - k5 - k7)*t + k8 * t)`]);;
e (SIMP_TAC [REAL_EXP_ADD]);;
e (SIMP_TAC [REAL_FIELD `((k4 - k5 - k7) * exp ((k4 - k5 - k7) * t) * exp (k8 * t) +
   	    k8 * exp ((k4 - k5 - k7) * t) * exp (k8 * t)) = ((k4 - k5 - k7) * exp ((k4 - k5 - k7) * 
	    t) + k8 * exp ((k4 - k5 - k7) * t)) * exp (k8 * t)`;
	    REAL_FIELD `((k1 - k3 - k6) * exp ((k1 - k3 - k6) * t) * exp (k8 * t) +
   	    k8 * exp ((k1 - k3 - k6) * t) * exp (k8 * t)) = 
	    ((k1 - k3 - k6) * exp ((k1 - k3 - k6) * t) +
   	    k8 * exp ((k1 - k3 - k6) * t)) * exp (k8 * t)`] );;
e (SIMP_TAC [REAL_FIELD `((((k4 - k5 - k7) * exp ((k4 - k5 - k7) * t) +
    	    k8 * exp ((k4 - k5 - k7) * t)) * exp (k8 * t)) * (k1 - k3 - k6 + k8) +
  	    (((k1 - k3 - k6) * exp ((k1 - k3 - k6) * t) + k8 * exp ((k1 - k3 - k6) * t)) * 
	    exp (k8 * t)) * (--k4 + k5 + k7 - k8)) = ((((k4 - k5 - k7) * exp ((k4 - k5 - k7) * t) +
    	    k8 * exp ((k4 - k5 - k7) * t))) * (k1 - k3 - k6 + k8) +
  	    (((k1 - k3 - k6) * exp ((k1 - k3 - k6) * t) + k8 * exp ((k1 - k3 - k6) * t))) *
  	    (--k4 + k5 + k7 - k8)) * exp (k8 * t)`]);;
e (SIMP_TAC [REAL_FIELD `&2 * exp (--k8 * t) * (k2 + &2 * k3) * k5 *
  	    ((((k4 - k5 - k7) * exp ((k4 - k5 - k7) * t) + k8 * exp ((k4 - k5 - k7) * t)) *
   	    (k1 - k3 - k6 + k8) + ((k1 - k3 - k6) * exp ((k1 - k3 - k6) * t) +
    	    k8 * exp ((k1 - k3 - k6) * t)) * (--k4 + k5 + k7 - k8)) * exp (k8 * t)) *
 	    (k1 - k3 - k4 + k5 - k6 + k7) = &2 * (exp (--k8 * t) * exp (k8 * t)) * (k2 + &2 * k3) *
 	    k5 * ((((k4 - k5 - k7) * exp ((k4 - k5 - k7) * t) + k8 * exp ((k4 - k5 - k7) * t)) *
   	    (k1 - k3 - k6 + k8) + ((k1 - k3 - k6) * exp ((k1 - k3 - k6) * t) +
    	    k8 * exp ((k1 - k3 - k6) * t)) * (--k4 + k5 + k7 - k8)) * 
	    (k1 - k3 - k4 + k5 - k6 + k7))`]);;
e (SIMP_TAC [REAL_EXP_NEG; REAL_FIELD ` --(k8:real) * t = --(k8 * t)`]);;
e (SIMP_TAC [REAL_MUL_LINV;REAL_EXP_NZ]);;
e (CONV_TAC REAL_FIELD);;

let TGM_LEMMA = top_thm();;

(*---------------------------------------------------------------------------*)

g `!k1 k2 k3 k4 k5 k6 k7 CSC P D M t k8.
       ~((--k1 + k3 + k4 - k5 + k6 - k7) *
       (--k1 + k3 + k6 - k8) * (--k4 + k5 + k7 - k8) = &0) /\
       ~(k1 - k3 - k4 + k5 - k6 + k7 = &0) /\
       (!t. CSC t = exp ((k1 - k3 - k6)*t)) /\ 
       (!t. P t =  ((exp ((k1 - k3 - k6) * t) - exp ((k4 - k5 - k7) * t)) *
              (k2 + &2 * k3)) / (k1 - k3 - k4 + k5 - k6 + k7)) /\
       (!t. D t = (&2 * exp (--k8 * t) * (k2 + &2 * k3) * k5 *
               ((-- &1 + exp ((k4 - k5 - k7 + k8) * t)) * k1 + k3 + k4 - k5 + k6 - k7 +
                exp ((k1 - k3 - k6 + k8) * t) * (--k4 + k5 + k7 - k8) +
                exp ((k4 - k5 - k7 + k8) * t) * (--k3 - k6 + k8))) /
               ((--k1 + k3 + k4 - k5 + k6 - k7) *
               (--k1 + k3 + k6 - k8) *
               (--k4 + k5 + k7 - k8))) /\ 
       (real_derivative M t = k6 * CSC t + k7 * P t + k8 * D t) ==>
       ((entities_deriv_vec [CSC;P;D;M] t):real^4) =
         transp ((st_matrix 
          (cancer_stem_cell CSC P D M k1 k2 k3 k4 k5 k6 k7 k8 t)):real^4^8) ** 
           flux (cancer_stem_cell CSC P D M k1 k2 k3 k4 k5 k6 k7 k8 t)`;;

e (REPEAT STRIP_TAC);;
e (KINETIC_SIMP [cancer_stem_cell; ST_MATRIX_CSC]);;
e (SIMP_TAC [TRANSP_8X3_MAT_LEMMA; FLUX_VECTOR_CSC; ST_MATRIX_CSC; MATRIX_VEXTOR_8X4]);;
e (SIMP_TAC [REAL_MUL_LID; REAL_MUL_LZERO; REAL_MUL_RZERO; REAL_ADD_RID; REAL_ADD_LID]);;
e (COMMON_TAC [VECTOR_8; VECTOR_4; DIMINDEX_8; DIMINDEX_4; FORALL_4]);;
e (SIMP_TAC [REAL_FIELD `!k. -- &1 * k = --k`; REAL_FIELD ` ! a b. (a:real) + --b = a - b`;  
  	     REAL_FIELD `! a b c. (a:real) + --(b * c) = a - b * c`]);;
e (SIMP_TAC [REAL_FIELD `(k1:real) * CSC t + --(k3 * CSC t) - k6 * CSC t =
                         k1 * CSC t - (k3 * CSC t) - k6 * CSC t`;
             REAL_FIELD ` (k2:real) * CSC t + &2 * k3 * CSC t + k4 * P t + --(k5 * P t) - 
	                 k7 * P t  = (k2  + &2 * k3) * CSC t + (k4 - k5  - k7) * P t`]);; 
e (SIMP_TAC [REAL_FIELD `(k1:real) * CSC t - k3 * CSC t - k6 * CSC t = 
                         (k1  - k3  - k6) * CSC t`]);;
e (CONJ_TAC);;
      e (ONCE_REWRITE_TAC [DERIV_ABST]);;
      e (ONCE_ASM_REWRITE_TAC []);;
      e (MATCH_MP_TAC HAS_REAL_DERIVATIVE_DERIVATIVE);;
      e (REAL_DIFF_TAC);;
      e (CONV_TAC REAL_FIELD);;

      e (CONJ_TAC);;
            e (ONCE_REWRITE_TAC [DERIV_ABST]);;
	    e (ONCE_ASM_REWRITE_TAC []);;
	    e (MATCH_MP_TAC HAS_REAL_DERIVATIVE_DERIVATIVE);;
	    e (REAL_DIFF_TAC);;
	    e (UNDISCH_TAC `~(k1 - k3 - k4 + k5 - k6 + k7 = &0)`);;
	    e (CONV_TAC REAL_FIELD);;
	    e (CONJ_TAC);;
	          e (ONCE_REWRITE_TAC [DERIV_ABST]);;
		  e (ONCE_ASM_REWRITE_TAC []);;
		  e (ASM_MESON_TAC [TGM_LEMMA]);;

		  e (ASM_SIMP_TAC []);;

let TUMOR_GROWTH_SOLUTION = top_thm();;


(*---------------------------------------------------------------------------*)
(*===========================================================================*)
(*           Formalization of the Tumor Growth Model based on CSCs           *)
(*===========================================================================*)
(*---------------------------------------------------------------------------*)


(*===========================================================================*)
(*                             CASE STUDY II                                 *)
(*---------------------------------------------------------------------------*)
(*     Time Evolution of another Tumor Growth based on Cancer Stem Cells     *)
(*===========================================================================*)


let tumor_growth_rk_model =  new_definition`
    tumor_growth_rk_model CSC P M k1 k2 k3 t = 
  [(irreversible, ([(1,CSC t); (0,P t); (0,M t)],
                   [(1,CSC t); (1,P t); (0,M t)], (k1,&0)));
   (irreversible, ([(1,CSC t); (0,P t); (0,M t)],
                   [(0,CSC t); (0,P t); (1,M t)], (k2,&0)));
   (irreversible, ([(0,CSC t); (1,P t); (0,M t)],
                   [(0,CSC t); (0,P t); (1,M t)], (k3,&0))) ]`;;


g `!k1 k2 k3 CSC P M t. 
    st_matrix (tumor_growth_rk_model CSC P M k1 k2 k3 t) = 
       vector
          [vector [&0; &1; &0];  
  	   vector [-- &1; &0; &1]; 
  	   vector [&0; -- &1; &1]]`;;

e (KINETIC_SIMP [tumor_growth_rk_model]);;
e (SIMP_TAC [REAL_FIELD `&0 - &0 = &0`;
             REAL_FIELD `!(a:real). &0 - a = --a`; 
             REAL_FIELD `!(a:real). a - &0 = a`;
             REAL_FIELD `a - a = &0`]);;

let ST_MATRIX_CSC_GROWTH = top_thm ();;


g `!k1 k2 k3 CSC P M t.
    flux (tumor_growth_rk_model CSC P M k1 k2 k3 t) = 
        vector
         [k1 * CSC t; k2 * CSC t; k3 * P t]`;;

e (KINETIC_SIMP [tumor_growth_rk_model]);;

let FLUX_VECTOR_CSC_GROWTH = top_thm ();;


(*===========================================================================*)
(*                         Main Lemma and  Theorem                           *)
(*===========================================================================*)

g `!k1 k2 k3 t.
    ~((k3 - k2) = &0) 
       ==>
    real_derivative
 (\t. ((k3 - k2 - k1) * exp (--k3 * t) + k1 * exp (--k2 * t)) / (k3 - k2))
 t =
 k1 * exp (--k2 * t) -
 &1 *
 k3 *
 ((k3 - k2 - k1) * exp (--k3 * t) + k1 * exp (--k2 * t)) / (k3 - k2)`;;

e (REPEAT STRIP_TAC);;
e (MATCH_MP_TAC HAS_REAL_DERIVATIVE_DERIVATIVE);;
e (REAL_DIFF_TAC);;
e (POP_ASSUM MP_TAC);;
e (CONV_TAC REAL_FIELD);;

let TGM_LEMMA_RK = top_thm();;


g `!k1 k2 k3 CSC P M t.
       ~(k3 -k2 = &0) /\
       (!t. CSC t = exp ((-- k2) * t)) /\
       (!t. P t =  ((k3 - k2 - k1) * exp ((-- k3) * t) + k1 * exp ((-- k2) * t)) / (k3 - k2)) /\
       (real_derivative M t = k2 * CSC t + k3 * P t) ==>
       ((entities_deriv_vec [CSC; P; M] t):real^3) =
         transp ((st_matrix 
          (tumor_growth_rk_model CSC P M k1 k2 k3 t)):real^3^3) ** 
           flux (tumor_growth_rk_model CSC P M k1 k2 k3 t)`;;

e (REPEAT STRIP_TAC);;
e (KINETIC_SIMP [tumor_growth_rk_model; ST_MATRIX_CSC_GROWTH]);;
e (SIMP_TAC [TRANSP_3X3_MAT_LEMMA; FLUX_VECTOR_CSC_GROWTH; ST_MATRIX_CSC_GROWTH; MATRIX_VEXTOR_3X3]);;
e (SIMP_TAC [REAL_MUL_LID; REAL_MUL_LZERO; REAL_MUL_RZERO; REAL_ADD_RID; REAL_ADD_LID]);;
e (COMMON_TAC [VECTOR_3; DIMINDEX_3; FORALL_3]);;
e (SIMP_TAC [REAL_FIELD `!k. -- &1 * k = --k`; REAL_FIELD ` ! a b. (a:real) + --b = a - b`; REAL_FIELD `(!k. -- (k * (b:real)) = --k * b)`; REAL_FIELD `! a b c. (a:real) + -- b * c = a - b * c`]);;
e (CONJ_TAC);;
      e (ONCE_REWRITE_TAC [DERIV_ABST]);;
      e (ONCE_ASM_REWRITE_TAC []);;
      e (MATCH_MP_TAC HAS_REAL_DERIVATIVE_DERIVATIVE);;
      e (REAL_DIFF_TAC);;
      e (CONV_TAC REAL_FIELD);;

      e (CONJ_TAC);;
      r (1);;
      e (ASM_SIMP_TAC []);;

            e (ONCE_REWRITE_TAC [DERIV_ABST]);;
	    e (ONCE_ASM_REWRITE_TAC []);;
            e (ASM_MESON_TAC [TGM_LEMMA_RK]);;

let TUMOR_GROWTH_SOLUTION_RK = top_thm();;


(*---------------------------------------------------------------------------*)
(*===================================End=====================================*)
(*---------------------------------------------------------------------------*)
